# Supplementary material for: A new spatiotemporal two-stage standardized weighted procedure for regional drought analysis
Source: PeerJ. 2022 May 2;10:e13249. doi: 10.7717/peerj.13249 (PMC9070328; doi:10.7717/peerj.13249)
Supplement: Supplemental Information 2 [file peerj-10-13249-s002.xlsx]

## Sheet: Sheet1
index	SPEI1Astore	Weights	index	SPEI1Bunji	Weights	index	spEI1gupis	weights	index	spEI1chilas	weights	index	spEI1gilgit	weights	index	spEI1 skardu	weights	index
1.07312	MW	0.0866128	1.15701	MW	0.171279	1.13861	MW	0.0885191	1.10491	MW	0.10789	1.14101	MW	0.179962	1.07839	MW	0.0989176	1.14101
0.586677	ND	0.661135	0.831422	ND	0.593697	0.799108	ND	0.683649	0.9076	ND	0.641276	0.847753	ND	0.576028	0.774371	ND	0.637777	0.799108
1.17455	MW	0.0866128	0.544406	ND	0.593697	0.251423	ND	0.683649	0.603616	ND	0.641276	0.346882	ND	0.576028	0.485366	ND	0.637777	0.251423
0.495191	ND	0.661135	0.138351	ND	0.593697	0.355898	ND	0.683649	0.143771	ND	0.641276	-0.0167109	ND	0.576028	-0.0685503	ND	0.637777	0.355898
-0.429173	ND	0.661135	-0.613144	ND	0.593697	-0.76303	ND	0.683649	-0.880393	ND	0.641276	-0.65598	ND	0.576028	-0.284099	ND	0.637777	-0.76303
-1.10561	MD	0.167163	-1.51203	SD	0.0267295	-0.764992	ND	0.683649	-1.37861	MD	0.185169	-1.36814	MD	0.192604	-1.11555	MD	0.188726	-0.764992
-1.30064	MD	0.167163	-1.20445	MD	0.185266	-1.36435	MD	0.162011	-1.43601	MD	0.185169	-1.11837	MD	0.192604	-1.24686	MD	0.188726	-1.11837
-1.40846	MD	0.167163	-1.09189	MD	0.185266	-1.33113	MD	0.162011	-1.24649	MD	0.185169	-1.24985	MD	0.192604	-1.25858	MD	0.188726	-1.24985
-0.644076	ND	0.661135	-0.541041	ND	0.593697	-0.588124	ND	0.683649	-0.568136	ND	0.641276	-0.487381	ND	0.576028	-0.547212	ND	0.637777	-0.588124
0.711504	ND	0.661135	0.672747	ND	0.593697	0.0679888	ND	0.683649	0.893114	ND	0.641276	0.303412	ND	0.576028	0.210028	ND	0.637777	0.0679888
0.0737498	ND	0.661135	0.681988	ND	0.593697	0.550117	ND	0.683649	0.542323	ND	0.641276	0.743946	ND	0.576028	0.525591	ND	0.637777	0.550117
0.453816	ND	0.661135	1.04081	MW	0.171279	0.881651	ND	0.683649	0.879466	ND	0.641276	1.12729	MW	0.179962	0.723177	ND	0.637777	0.881651
0.378422	ND	0.661135	1.0532	MW	0.171279	0.887528	ND	0.683649	0.860158	ND	0.641276	1.08873	MW	0.179962	0.756425	ND	0.637777	0.887528
0.988559	ND	0.661135	1.14047	MW	0.171279	0.911788	ND	0.683649	1.37239	MW	0.10789	1.51588	SW	0.0246556	0.63603	ND	0.637777	0.911788
-0.124064	ND	0.661135	0.368163	ND	0.593697	0.052903	ND	0.683649	0.0306405	ND	0.641276	0.181465	ND	0.576028	0.0604265	ND	0.637777	0.052903
0.964351	ND	0.661135	-0.38104	ND	0.593697	-0.129269	ND	0.683649	-0.457281	ND	0.641276	-0.462317	ND	0.576028	-0.0194863	ND	0.637777	-0.129269
-0.975423	ND	0.661135	-1.18019	MD	0.185266	-0.872071	ND	0.683649	-1.15759	MD	0.185169	-1.16081	MD	0.192604	-0.937242	ND	0.637777	-0.872071
-1.50727	SD	0.0213547	-1.39175	MD	0.185266	-1.50216	SD	0.0462887	-1.42922	MD	0.185169	-1.46332	MD	0.192604	-1.20142	MD	0.188726	-1.46332
-1.21847	MD	0.167163	-1.54311	SD	0.0267295	-1.18531	MD	0.162011	-1.31072	MD	0.185169	-1.27439	MD	0.192604	-1.28024	MD	0.188726	-1.27439
-1.2582	MD	0.167163	-1.1841	MD	0.185266	-1.16155	MD	0.162011	-1.2022	MD	0.185169	-1.1514	MD	0.192604	-1.00918	MD	0.188726	-1.1514
-0.847159	ND	0.661135	-0.409089	ND	0.593697	-0.143883	ND	0.683649	-0.590234	ND	0.641276	-0.456673	ND	0.576028	-0.433886	ND	0.637777	-0.143883
-0.327046	ND	0.661135	0.00435869	ND	0.593697	0.0679723	ND	0.683649	-0.0485616	ND	0.641276	0.0447846	ND	0.576028	0.137007	ND	0.637777	0.0679723
0.0940562	ND	0.661135	0.688813	ND	0.593697	0.541633	ND	0.683649	0.604624	ND	0.641276	0.710403	ND	0.576028	0.505777	ND	0.637777	0.541633
0.301946	ND	0.661135	0.998398	ND	0.593697	0.804043	ND	0.683649	0.870468	ND	0.641276	1.04513	MW	0.179962	0.728711	ND	0.637777	0.804043
0.985114	ND	0.661135	1.26208	MW	0.171279	1.06359	MW	0.0885191	1.01472	MW	0.10789	1.25983	MW	0.179962	0.760143	ND	0.637777	0.985114
0.941691	ND	0.661135	1.1305	MW	0.171279	0.934001	ND	0.683649	0.985383	ND	0.641276	1.03636	MW	0.179962	1.13626	MW	0.0989176	0.934001
3.15948	EW	0.0301253	1.0042	MW	0.171279	0.385239	ND	0.683649	0.977548	ND	0.641276	0.634549	ND	0.576028	2.81319	EW	0.015915	0.385239
0.41046	ND	0.661135	-0.289458	ND	0.593697	-0.175842	ND	0.683649	-0.165259	ND	0.641276	-0.152333	ND	0.576028	0.0948052	ND	0.637777	-0.175842
1.8789	SW	0.0336097	0.228511	ND	0.593697	0.0166033	ND	0.683649	0.46456	ND	0.641276	-0.0264174	ND	0.576028	1.26863	MW	0.0989176	0.0166033
-1.41576	MD	0.167163	-1.20934	MD	0.185266	-1.0813	MD	0.162011	-1.41493	MD	0.185169	-1.27431	MD	0.192604	-1.02113	MD	0.188726	-1.27431
-1.23452	MD	0.167163	-1.11108	MD	0.185266	-1.18862	MD	0.162011	-1.19954	MD	0.185169	-1.03819	MD	0.192604	-0.852538	ND	0.637777	-0.852538
-0.965926	ND	0.661135	-0.75506	ND	0.593697	-0.641929	ND	0.683649	-0.880364	ND	0.641276	-0.611727	ND	0.576028	-0.758364	ND	0.637777	-0.641929
-0.354342	ND	0.661135	-0.484883	ND	0.593697	-0.450988	ND	0.683649	-0.504427	ND	0.641276	-0.491021	ND	0.576028	-0.463327	ND	0.637777	-0.450988
0.10226	ND	0.661135	0.230529	ND	0.593697	0.0455796	ND	0.683649	0.100173	ND	0.641276	0.16022	ND	0.576028	0.00164481	ND	0.637777	0.0455796
0.116784	ND	0.661135	0.671376	ND	0.593697	0.553716	ND	0.683649	0.544865	ND	0.641276	0.749943	ND	0.576028	0.54793	ND	0.637777	0.553716
0.707216	ND	0.661135	1.13487	MW	0.171279	0.973911	ND	0.683649	0.866705	ND	0.641276	1.18913	MW	0.179962	0.90162	ND	0.637777	0.973911
2.27477	EW	0.0301253	1.92507	SW	0.0159668	1.0854	MW	0.0885191	2.03533	EW	0.0159084	1.97437	SW	0.0246556	1.85759	SW	0.0319554	1.0854
1.01126	MW	0.0866128	1.22684	MW	0.171279	0.787034	ND	0.683649	1.01907	MW	0.10789	1.28081	MW	0.179962	1.24185	MW	0.0989176	0.787034
1.98628	SW	0.0336097	1.76361	SW	0.0159668	0.743648	ND	0.683649	1.33988	MW	0.10789	1.85587	SW	0.0246556	1.52003	SW	0.0319554	0.743648
1.73399	SW	0.0336097	0.504597	ND	0.593697	0.0440063	ND	0.683649	0.369587	ND	0.641276	0.167974	ND	0.576028	0.880813	ND	0.637777	0.0440063
-0.485383	ND	0.661135	-0.725672	ND	0.593697	-0.771154	ND	0.683649	-0.929871	ND	0.641276	-0.680834	ND	0.576028	-0.31217	ND	0.637777	-0.771154
-1.70449	SD	0.0213547	-1.69028	SD	0.0267295	-1.54179	SD	0.0462887	-1.88021	SD	0.0249294	-1.6719	SD	0.0249672	-1.40335	MD	0.188726	-1.40335
-1.29377	MD	0.167163	-1.15577	MD	0.185266	-1.12984	MD	0.162011	-1.36363	MD	0.185169	-1.15811	MD	0.192604	-1.422	MD	0.188726	-1.15811
-0.888537	ND	0.661135	-1.04822	MD	0.185266	-1.12666	MD	0.162011	-1.10215	MD	0.185169	-1.11561	MD	0.192604	-0.743447	ND	0.637777	-0.888537
-0.947288	ND	0.661135	-0.523729	ND	0.593697	-0.394959	ND	0.683649	-0.61836	ND	0.641276	-0.556606	ND	0.576028	-0.642897	ND	0.637777	-0.394959
-0.156728	ND	0.661135	0.170201	ND	0.593697	0.0348932	ND	0.683649	-0.0940987	ND	0.641276	0.0560029	ND	0.576028	-0.00186669	ND	0.637777	0.0348932
0.0334383	ND	0.661135	0.574606	ND	0.593697	0.455102	ND	0.683649	0.481034	ND	0.641276	0.653733	ND	0.576028	0.450088	ND	0.637777	0.455102
0.324285	ND	0.661135	1.0364	MW	0.171279	0.985179	ND	0.683649	0.911437	ND	0.641276	1.10238	MW	0.179962	0.752588	ND	0.637777	0.985179
1.39479	MW	0.0866128	1.21857	MW	0.171279	1.15069	MW	0.0885191	1.18614	MW	0.10789	1.36001	MW	0.179962	2.60856	EW	0.015915	1.36001
1.01211	MW	0.0866128	1.10057	MW	0.171279	0.847726	ND	0.683649	1.08239	MW	0.10789	1.03564	MW	0.179962	2.16851	EW	0.015915	0.847726
0.718531	ND	0.661135	0.454327	ND	0.593697	0.0694812	ND	0.683649	0.201625	ND	0.641276	0.169095	ND	0.576028	1.49766	MW	0.0989176	0.0694812
-0.038882	ND	0.661135	-0.495315	ND	0.593697	-0.260794	ND	0.683649	-0.556382	ND	0.641276	-0.500223	ND	0.576028	-0.347233	ND	0.637777	-0.260794
0.462889	ND	0.661135	-0.301251	ND	0.593697	-0.583859	ND	0.683649	-0.935598	ND	0.641276	-0.75342	ND	0.576028	-0.619917	ND	0.637777	-0.583859
-0.508966	ND	0.661135	-1.01669	MD	0.185266	-1.1566	MD	0.162011	-1.00648	MD	0.185169	-0.747125	ND	0.576028	-0.596232	ND	0.637777	-0.508966
-1.12848	MD	0.167163	-1.21244	MD	0.185266	-1.36278	MD	0.162011	-1.3097	MD	0.185169	-1.20794	MD	0.192604	-1.16543	MD	0.188726	-1.20794
-1.15525	MD	0.167163	-1.30925	MD	0.185266	-1.17604	MD	0.162011	-1.15526	MD	0.185169	-1.14384	MD	0.192604	-1.20148	MD	0.188726	-1.14384
-0.367525	ND	0.661135	-0.462595	ND	0.593697	-0.196082	ND	0.683649	-0.557475	ND	0.641276	-0.366817	ND	0.576028	-0.325106	ND	0.637777	-0.196082
-0.347255	ND	0.661135	-0.060595	ND	0.593697	-0.0192051	ND	0.683649	-0.0955148	ND	0.641276	-0.0164477	ND	0.576028	-0.0309272	ND	0.637777	-0.0192051
0.120921	ND	0.661135	0.687987	ND	0.593697	0.558746	ND	0.683649	0.563511	ND	0.641276	0.776422	ND	0.576028	0.537515	ND	0.637777	0.558746
0.773977	ND	0.661135	1.31456	MW	0.171279	1.08801	MW	0.0885191	1.01752	MW	0.10789	1.36917	MW	0.179962	1.48155	MW	0.0989176	0.773977
0.973518	ND	0.661135	1.22157	MW	0.171279	1.03237	MW	0.0885191	0.949789	ND	0.641276	1.34747	MW	0.179962	1.33636	MW	0.0989176	0.973518
0.750319	ND	0.661135	0.995177	ND	0.593697	0.877222	ND	0.683649	0.836711	ND	0.641276	1.09372	MW	0.179962	1.47085	MW	0.0989176	0.877222
0.942132	ND	0.661135	0.327624	ND	0.593697	0.512307	ND	0.683649	0.246494	ND	0.641276	0.413666	ND	0.576028	2.28484	EW	0.015915	0.512307
0.284791	ND	0.661135	-0.280685	ND	0.593697	0.097811	ND	0.683649	-0.198242	ND	0.641276	-0.0648046	ND	0.576028	-0.0682144	ND	0.637777	0.097811
1.14556	MW	0.0866128	-0.192716	ND	0.593697	-0.0574211	ND	0.683649	-0.780854	ND	0.641276	-0.203332	ND	0.576028	-0.0316536	ND	0.637777	-0.0574211
-1.30848	MD	0.167163	-1.36797	MD	0.185266	-1.21929	MD	0.162011	-1.26574	MD	0.185169	-1.3199	MD	0.192604	-1.06157	MD	0.188726	-1.3199
-1.04961	MD	0.167163	-1.07898	MD	0.185266	-1.31023	MD	0.162011	-1.17059	MD	0.185169	-1.04354	MD	0.192604	-0.851406	ND	0.637777	-0.851406
-0.606756	ND	0.661135	-0.736362	ND	0.593697	-0.810992	ND	0.683649	-1.03923	MD	0.185169	-0.675627	ND	0.576028	-0.614164	ND	0.637777	-0.810992
-0.610491	ND	0.661135	-0.531639	ND	0.593697	-0.45196	ND	0.683649	-0.540581	ND	0.641276	-0.561379	ND	0.576028	-0.383947	ND	0.637777	-0.45196
-0.391568	ND	0.661135	-0.116116	ND	0.593697	-0.0518177	ND	0.683649	-0.138177	ND	0.641276	0.00927574	ND	0.576028	-0.0368711	ND	0.637777	-0.0518177
0.213969	ND	0.661135	0.73384	ND	0.593697	0.658708	ND	0.683649	0.716324	ND	0.641276	0.792146	ND	0.576028	0.565875	ND	0.637777	0.658708
0.543859	ND	0.661135	1.0878	MW	0.171279	1.01026	MW	0.0885191	0.895399	ND	0.641276	1.11109	MW	0.179962	0.896954	ND	0.637777	0.543859
1.07024	MW	0.0866128	1.31571	MW	0.171279	1.04189	MW	0.0885191	0.894451	ND	0.641276	1.28291	MW	0.179962	1.0569	MW	0.0989176	0.894451
1.38583	MW	0.0866128	1.22137	MW	0.171279	1.1977	MW	0.0885191	0.84159	ND	0.641276	1.24792	MW	0.179962	1.46443	MW	0.0989176	0.84159
0.876129	ND	0.661135	0.462951	ND	0.593697	0.432421	ND	0.683649	0.236905	ND	0.641276	0.420624	ND	0.576028	0.526748	ND	0.637777	0.432421
-0.647789	ND	0.661135	-0.533395	ND	0.593697	-0.32867	ND	0.683649	-0.638584	ND	0.641276	-0.381318	ND	0.576028	-0.295877	ND	0.637777	-0.32867
-0.967913	ND	0.661135	-1.11812	MD	0.185266	-0.898423	ND	0.683649	-1.24078	MD	0.185169	-1.08753	MD	0.192604	-0.809602	ND	0.637777	-0.898423
-1.33621	MD	0.167163	-1.44089	MD	0.185266	-1.02392	MD	0.162011	-1.32307	MD	0.185169	-1.30841	MD	0.192604	-0.912054	ND	0.637777	-0.912054
-1.64001	SD	0.0213547	-1.52193	SD	0.0267295	-1.75823	SD	0.0462887	-1.65238	SD	0.0249294	-1.59601	SD	0.0249672	-1.53539	SD	0.0267087	-1.75823
0.335552	ND	0.661135	-0.164594	ND	0.593697	-0.944764	ND	0.683649	-0.155348	ND	0.641276	-0.23834	ND	0.576028	0.0269583	ND	0.637777	-0.944764
0.165513	ND	0.661135	-0.591224	ND	0.593697	-0.411247	ND	0.683649	-0.543746	ND	0.641276	-0.508272	ND	0.576028	-0.390396	ND	0.637777	-0.411247
0.327009	ND	0.661135	0.286501	ND	0.593697	0.342159	ND	0.683649	0.119962	ND	0.641276	0.250733	ND	0.576028	0.259591	ND	0.637777	0.342159
0.0684629	ND	0.661135	0.632472	ND	0.593697	0.511275	ND	0.683649	0.574512	ND	0.641276	0.679433	ND	0.576028	0.491703	ND	0.637777	0.511275
0.563675	ND	0.661135	1.07858	MW	0.171279	1.00169	MW	0.0885191	0.919739	ND	0.641276	1.13417	MW	0.179962	0.84306	ND	0.637777	0.563675
1.20939	MW	0.0866128	1.43341	MW	0.171279	1.41651	MW	0.0885191	1.45874	MW	0.10789	1.21807	MW	0.179962	1.26919	MW	0.0989176	1.21807
0.47427	ND	0.661135	0.811925	ND	0.593697	0.603477	ND	0.683649	0.636708	ND	0.641276	0.874634	ND	0.576028	0.779644	ND	0.637777	0.603477
0.0575781	ND	0.661135	0.0431891	ND	0.593697	0.0268678	ND	0.683649	-0.0922993	ND	0.641276	0.0407746	ND	0.576028	0.135007	ND	0.637777	0.0268678
-0.298097	ND	0.661135	-0.333091	ND	0.593697	-0.406501	ND	0.683649	-0.468568	ND	0.641276	-0.348196	ND	0.576028	0.0585162	ND	0.637777	-0.406501
-0.946876	ND	0.661135	-0.941438	ND	0.593697	-0.671242	ND	0.683649	-1.01895	MD	0.185169	-0.985794	ND	0.576028	-0.744805	ND	0.637777	-0.671242
-1.45799	MD	0.167163	-1.40028	MD	0.185266	-1.26643	MD	0.162011	-1.4305	MD	0.185169	-1.31925	MD	0.192604	-1.31503	MD	0.188726	-1.31925
-1.64732	SD	0.0213547	-1.72326	SD	0.0267295	-1.61759	SD	0.0462887	-1.71533	SD	0.0249294	-1.40516	MD	0.192604	-1.49366	MD	0.188726	-1.40516
-1.11039	MD	0.167163	-1.33722	MD	0.185266	-1.32164	MD	0.162011	-1.29153	MD	0.185169	-1.16655	MD	0.192604	-1.21096	MD	0.188726	-1.16655
-0.514558	ND	0.661135	-0.548897	ND	0.593697	-0.475967	ND	0.683649	-0.533587	ND	0.641276	-0.556043	ND	0.576028	-0.560415	ND	0.637777	-0.475967
0.7026	ND	0.661135	0.283191	ND	0.593697	0.0287353	ND	0.683649	0.0300497	ND	0.641276	0.125049	ND	0.576028	0.48161	ND	0.637777	0.0287353
0.366559	ND	0.661135	0.636488	ND	0.593697	0.612623	ND	0.683649	0.561805	ND	0.641276	0.747028	ND	0.576028	0.581201	ND	0.637777	0.612623
0.841895	ND	0.661135	1.19597	MW	0.171279	1.04101	MW	0.0885191	1.07723	MW	0.10789	1.25949	MW	0.179962	1.20739	MW	0.0989176	0.841895
0.769512	ND	0.661135	1.12025	MW	0.171279	1.00526	MW	0.0885191	0.954719	ND	0.641276	1.24172	MW	0.179962	1.27782	MW	0.0989176	0.769512
0.81453	ND	0.661135	0.845845	ND	0.593697	0.716019	ND	0.683649	0.745836	ND	0.641276	0.931918	ND	0.576028	0.828243	ND	0.637777	0.716019
1.18001	MW	0.0866128	0.732471	ND	0.593697	0.332496	ND	0.683649	0.298989	ND	0.641276	0.533165	ND	0.576028	0.681963	ND	0.637777	0.332496
-0.163681	ND	0.661135	-0.520465	ND	0.593697	-0.395235	ND	0.683649	-0.578033	ND	0.641276	-0.462756	ND	0.576028	-0.292974	ND	0.637777	-0.395235
-0.163662	ND	0.661135	-0.549574	ND	0.593697	-1.11408	MD	0.162011	-0.528843	ND	0.641276	-0.368946	ND	0.576028	-0.504824	ND	0.637777	-0.163662
-1.43387	MD	0.167163	-1.64979	SD	0.0267295	-1.52844	SD	0.0462887	-1.84091	SD	0.0249294	-1.54529	SD	0.0249672	-1.10987	MD	0.188726	-1.10987
-0.158425	ND	0.661135	-0.998915	ND	0.593697	-1.47343	MD	0.162011	-1.06872	MD	0.185169	-0.623135	ND	0.576028	-1.15998	MD	0.188726	-0.158425
-1.22996	MD	0.167163	-1.10119	MD	0.185266	-1.35019	MD	0.162011	-0.99301	ND	0.641276	-0.907966	ND	0.576028	-0.917269	ND	0.637777	-0.99301
-0.834426	ND	0.661135	-0.786743	ND	0.593697	-0.717027	ND	0.683649	-0.600291	ND	0.641276	-0.428488	ND	0.576028	-0.503363	ND	0.637777	-0.717027
-0.444621	ND	0.661135	-0.170006	ND	0.593697	-0.101179	ND	0.683649	-0.10651	ND	0.641276	-0.0284723	ND	0.576028	-0.0429155	ND	0.637777	-0.101179
1.24346	MW	0.0866128	0.920163	ND	0.593697	0.695965	ND	0.683649	0.798808	ND	0.641276	0.96325	ND	0.576028	0.983413	ND	0.637777	0.695965
0.323511	ND	0.661135	0.998231	ND	0.593697	0.867945	ND	0.683649	0.845165	ND	0.641276	1.07542	MW	0.179962	0.878143	ND	0.637777	0.867945
0.561153	ND	0.661135	1.01997	MW	0.171279	0.899792	ND	0.683649	1.19467	MW	0.10789	1.14438	MW	0.179962	0.879728	ND	0.637777	0.899792
0.390409	ND	0.661135	0.743685	ND	0.593697	0.701562	ND	0.683649	0.947688	ND	0.641276	0.853776	ND	0.576028	0.592821	ND	0.637777	0.701562
1.31597	MW	0.0866128	0.522818	ND	0.593697	0.310318	ND	0.683649	1.254	MW	0.10789	0.499976	ND	0.576028	0.904866	ND	0.637777	0.310318
1.32275	MW	0.0866128	0.886461	ND	0.593697	1.60376	SW	0.0141916	1.12753	MW	0.10789	1.76787	SW	0.0246556	-0.225238	ND	0.637777	-0.225238
0.90121	ND	0.661135	-0.303021	ND	0.593697	0.184608	ND	0.683649	0.732058	ND	0.641276	0.066214	ND	0.576028	-0.124363	ND	0.637777	0.184608
-1.22676	MD	0.167163	-1.40376	MD	0.185266	-1.17113	MD	0.162011	-1.35146	MD	0.185169	-1.34005	MD	0.192604	-1.2403	MD	0.188726	-1.34005
-1.64772	SD	0.0213547	-1.61998	SD	0.0267295	-1.57205	SD	0.0462887	-1.51347	SD	0.0249294	-1.60384	SD	0.0249672	-1.5028	SD	0.0267087	-1.57205
-0.645684	ND	0.661135	-0.613419	ND	0.593697	-0.506356	ND	0.683649	-0.580191	ND	0.641276	-0.417375	ND	0.576028	-1.05765	MD	0.188726	-0.506356
-0.369783	ND	0.661135	-0.659298	ND	0.593697	-0.479838	ND	0.683649	-0.410577	ND	0.641276	-0.572666	ND	0.576028	-0.376734	ND	0.637777	-0.479838
-0.341951	ND	0.661135	-0.21878	ND	0.593697	-0.149868	ND	0.683649	-0.121739	ND	0.641276	-0.0272545	ND	0.576028	0.0398031	ND	0.637777	-0.149868
0.37865	ND	0.661135	0.602037	ND	0.593697	0.536191	ND	0.683649	0.704819	ND	0.641276	0.744047	ND	0.576028	0.789194	ND	0.637777	0.536191
0.637711	ND	0.661135	1.02368	MW	0.171279	0.89972	ND	0.683649	0.91568	ND	0.641276	1.2028	MW	0.179962	1.0618	MW	0.0989176	0.89972
0.717338	ND	0.661135	1.05132	MW	0.171279	0.929089	ND	0.683649	0.954475	ND	0.641276	1.1696	MW	0.179962	0.934607	ND	0.637777	0.929089
2.35354	EW	0.0301253	1.22881	MW	0.171279	0.757149	ND	0.683649	1.1332	MW	0.10789	1.19664	MW	0.179962	1.27635	MW	0.0989176	0.757149
0.663956	ND	0.661135	0.315841	ND	0.593697	0.252345	ND	0.683649	0.678918	ND	0.641276	0.446102	ND	0.576028	0.576823	ND	0.637777	0.252345
-0.0917038	ND	0.661135	-0.430025	ND	0.593697	-0.54907	ND	0.683649	-0.256456	ND	0.641276	-0.383521	ND	0.576028	-0.290751	ND	0.637777	-0.54907
-0.117229	ND	0.661135	-0.463289	ND	0.593697	-0.726785	ND	0.683649	-0.308092	ND	0.641276	-0.41208	ND	0.576028	-0.661351	ND	0.637777	-0.726785
-1.20177	MD	0.167163	-1.59036	SD	0.0267295	-1.45977	MD	0.162011	-1.46915	MD	0.185169	-1.35354	MD	0.192604	-1.2272	MD	0.188726	-1.35354
-1.35339	MD	0.167163	-1.11051	MD	0.185266	-1.50836	SD	0.0462887	-1.30371	MD	0.185169	-1.04291	MD	0.192604	-1.07311	MD	0.188726	-1.04291
-1.12185	MD	0.167163	-1.37258	MD	0.185266	-1.27604	MD	0.162011	-1.07052	MD	0.185169	-1.0643	MD	0.192604	-1.04562	MD	0.188726	-1.0643
-0.0595264	ND	0.661135	-0.201983	ND	0.593697	-0.429571	ND	0.683649	-0.513539	ND	0.641276	-0.247326	ND	0.576028	-0.159546	ND	0.637777	-0.429571
-0.141962	ND	0.661135	-0.202219	ND	0.593697	-0.0983798	ND	0.683649	0.00671066	ND	0.641276	0.0312831	ND	0.576028	0.148692	ND	0.637777	-0.0983798
0.105572	ND	0.661135	0.579485	ND	0.593697	0.558076	ND	0.683649	0.579037	ND	0.641276	0.708418	ND	0.576028	0.535568	ND	0.637777	0.558076
0.376084	ND	0.661135	0.917032	ND	0.593697	0.860901	ND	0.683649	0.829502	ND	0.641276	1.04551	MW	0.179962	0.790906	ND	0.637777	0.860901
1.24667	MW	0.0866128	1.1925	MW	0.171279	0.904211	ND	0.683649	1.1451	MW	0.10789	1.20954	MW	0.179962	0.974852	ND	0.637777	0.904211
1.17186	MW	0.0866128	0.887545	ND	0.593697	0.702432	ND	0.683649	0.936387	ND	0.641276	0.983955	ND	0.576028	0.838913	ND	0.637777	0.702432
2.09237	EW	0.0301253	1.3051	MW	0.171279	0.217228	ND	0.683649	1.68505	SW	0.0248265	1.06273	MW	0.179962	0.495798	ND	0.637777	0.217228
2.20553	EW	0.0301253	1.29155	MW	0.171279	0.742467	ND	0.683649	1.83446	SW	0.0248265	1.21939	MW	0.179962	0.819382	ND	0.637777	0.742467
-0.652179	ND	0.661135	-1.15415	MD	0.185266	-1.28385	MD	0.162011	-0.776552	ND	0.641276	-0.891038	ND	0.576028	-0.605892	ND	0.637777	-0.652179
-0.811061	ND	0.661135	-1.1698	MD	0.185266	-1.26544	MD	0.162011	-0.864345	ND	0.641276	-1.08799	MD	0.192604	-0.842225	ND	0.637777	-0.811061
-1.07496	MD	0.167163	-1.37424	MD	0.185266	-1.52863	SD	0.0462887	-1.2457	MD	0.185169	-1.25285	MD	0.192604	-1.08462	MD	0.188726	-1.25285
-1.16644	MD	0.167163	-1.27808	MD	0.185266	-1.2139	MD	0.162011	-1.06686	MD	0.185169	-0.899544	ND	0.576028	-1.04878	MD	0.188726	-0.899544
-0.541565	ND	0.661135	-0.567249	ND	0.593697	-0.621612	ND	0.683649	-0.629212	ND	0.641276	-0.457194	ND	0.576028	-0.562306	ND	0.637777	-0.621612
-0.0158137	ND	0.661135	0.0806447	ND	0.593697	0.0439003	ND	0.683649	0.0202291	ND	0.641276	0.302304	ND	0.576028	0.0048297	ND	0.637777	0.0439003
0.405819	ND	0.661135	0.690743	ND	0.593697	0.548974	ND	0.683649	0.583361	ND	0.641276	0.77741	ND	0.576028	0.76215	ND	0.637777	0.548974
0.320299	ND	0.661135	1.04231	MW	0.171279	0.878325	ND	0.683649	0.848145	ND	0.641276	1.11646	MW	0.179962	0.758752	ND	0.637777	0.878325
0.500287	ND	0.661135	1.09798	MW	0.171279	0.861517	ND	0.683649	0.845242	ND	0.641276	1.09201	MW	0.179962	0.76069	ND	0.637777	0.861517
0.916412	ND	0.661135	1.04882	MW	0.171279	0.822698	ND	0.683649	0.915193	ND	0.641276	1.04805	MW	0.179962	0.941414	ND	0.637777	0.822698
0.657794	ND	0.661135	0.384072	ND	0.593697	0.286303	ND	0.683649	0.461444	ND	0.641276	0.562193	ND	0.576028	0.260066	ND	0.637777	0.286303
-0.629225	ND	0.661135	-0.561703	ND	0.593697	-0.499613	ND	0.683649	-0.578595	ND	0.641276	-0.200717	ND	0.576028	-0.439588	ND	0.637777	-0.499613
-1.0853	MD	0.167163	-1.22031	MD	0.185266	-0.992136	ND	0.683649	-1.06859	MD	0.185169	-0.964212	ND	0.576028	-0.912121	ND	0.637777	-0.992136
-1.38966	MD	0.167163	-1.54724	SD	0.0267295	-1.30176	MD	0.162011	-1.31022	MD	0.185169	-1.31972	MD	0.192604	-1.32726	MD	0.188726	-1.31972
-1.50685	SD	0.0213547	-1.53219	SD	0.0267295	-1.49769	MD	0.162011	-1.43928	MD	0.185169	-1.36143	MD	0.192604	-1.48769	MD	0.188726	-1.36143
-1.45217	MD	0.167163	-1.35222	MD	0.185266	-1.43661	MD	0.162011	-1.26466	MD	0.185169	-1.19539	MD	0.192604	-1.18694	MD	0.188726	-1.19539
-0.702454	ND	0.661135	-0.493816	ND	0.593697	-0.357485	ND	0.683649	-0.505889	ND	0.641276	-0.328005	ND	0.576028	-0.521316	ND	0.637777	-0.357485
0.887122	ND	0.661135	0.310696	ND	0.593697	0.111477	ND	0.683649	0.321679	ND	0.641276	0.455579	ND	0.576028	0.609696	ND	0.637777	0.111477
1.06625	MW	0.0866128	0.901214	ND	0.593697	0.686438	ND	0.683649	1.10156	MW	0.10789	1.0784	MW	0.179962	1.08225	MW	0.0989176	0.686438
1.28425	MW	0.0866128	1.65224	SW	0.0159668	1.02602	MW	0.0885191	1.49455	MW	0.10789	1.33921	MW	0.179962	1.16695	MW	0.0989176	1.33921
1.28769	MW	0.0866128	1.35015	MW	0.171279	0.972296	ND	0.683649	1.02477	MW	0.10789	1.18724	MW	0.179962	1.24772	MW	0.0989176	0.972296
0.488844	ND	0.661135	0.836813	ND	0.593697	0.795082	ND	0.683649	0.700352	ND	0.641276	0.924518	ND	0.576028	0.960113	ND	0.637777	0.795082
2.04277	EW	0.0301253	0.931721	ND	0.593697	0.894971	ND	0.683649	1.72378	SW	0.0248265	0.967544	ND	0.576028	2.06591	EW	0.015915	0.894971
-0.277229	ND	0.661135	-0.399278	ND	0.593697	-0.234142	ND	0.683649	-0.343075	ND	0.641276	-0.287542	ND	0.576028	-0.16674	ND	0.637777	-0.234142
-0.955172	ND	0.661135	-1.00452	MD	0.185266	-0.817827	ND	0.683649	-0.998014	ND	0.641276	-0.991504	ND	0.576028	-0.878561	ND	0.637777	-0.817827
-0.693308	ND	0.661135	-1.25862	MD	0.185266	-1.26764	MD	0.162011	-1.30566	MD	0.185169	-1.19091	MD	0.192604	-0.94634	ND	0.637777	-0.693308
-1.44737	MD	0.167163	-1.25093	MD	0.185266	-1.49063	MD	0.162011	-1.42015	MD	0.185169	-1.405	MD	0.192604	-1.20885	MD	0.188726	-1.405
-1.23933	MD	0.167163	-1.13264	MD	0.185266	-0.86674	ND	0.683649	-1.10341	MD	0.185169	-1.16778	MD	0.192604	-1.35641	MD	0.188726	-0.86674
-0.99204	ND	0.661135	-0.84523	ND	0.593697	-0.595913	ND	0.683649	-0.774596	ND	0.641276	-0.764483	ND	0.576028	-0.701303	ND	0.637777	-0.595913
-0.413179	ND	0.661135	-0.0712063	ND	0.593697	0.0436781	ND	0.683649	-0.097154	ND	0.641276	0.0357806	ND	0.576028	-0.0272441	ND	0.637777	0.0436781
0.0804667	ND	0.661135	0.578633	ND	0.593697	0.50959	ND	0.683649	0.513387	ND	0.641276	0.677798	ND	0.576028	0.418321	ND	0.637777	0.50959
0.487962	ND	0.661135	1.01297	MW	0.171279	0.891073	ND	0.683649	0.884376	ND	0.641276	1.09854	MW	0.179962	0.720621	ND	0.637777	0.891073
0.473322	ND	0.661135	1.12775	MW	0.171279	1.16558	MW	0.0885191	0.884881	ND	0.641276	1.12939	MW	0.179962	0.778674	ND	0.637777	0.473322
0.587175	ND	0.661135	0.970044	ND	0.593697	0.850453	ND	0.683649	0.877996	ND	0.641276	0.986776	ND	0.576028	0.687279	ND	0.637777	0.850453
1.26085	MW	0.0866128	0.154257	ND	0.593697	0.144672	ND	0.683649	0.0241273	ND	0.641276	0.276922	ND	0.576028	0.282611	ND	0.637777	0.144672
0.82165	ND	0.661135	-0.0591756	ND	0.593697	-0.0748248	ND	0.683649	-0.126203	ND	0.641276	-0.294336	ND	0.576028	0.0415561	ND	0.637777	-0.0748248
1.2157	MW	0.0866128	0.734534	ND	0.593697	-0.511502	ND	0.683649	-0.0591102	ND	0.641276	0.0452681	ND	0.576028	0.181494	ND	0.637777	-0.511502
-1.43867	MD	0.167163	-1.60718	SD	0.0267295	-1.54016	SD	0.0462887	-1.56231	SD	0.0249294	-1.51703	SD	0.0249672	-1.57707	SD	0.0267087	-1.43867
-1.20324	MD	0.167163	-1.11626	MD	0.185266	-1.3967	MD	0.162011	-0.473317	ND	0.641276	-1.3008	MD	0.192604	-1.40234	MD	0.188726	-0.473317
-0.722698	ND	0.661135	-1.43683	MD	0.185266	-1.40338	MD	0.162011	-1.33224	MD	0.185169	-1.2885	MD	0.192604	-1.53506	SD	0.0267087	-0.722698
-0.294943	ND	0.661135	0.158911	ND	0.593697	-0.379277	ND	0.683649	-0.435131	ND	0.641276	-0.253019	ND	0.576028	-0.504099	ND	0.637777	-0.379277
-0.340103	ND	0.661135	-0.0299192	ND	0.593697	0.0736835	ND	0.683649	-0.065375	ND	0.641276	0.0734969	ND	0.576028	-0.0954908	ND	0.637777	0.0736835
0.367115	ND	0.661135	0.755931	ND	0.593697	0.847556	ND	0.683649	0.667571	ND	0.641276	0.916488	ND	0.576028	0.566662	ND	0.637777	0.847556
0.669751	ND	0.661135	1.20958	MW	0.171279	0.984052	ND	0.683649	1.02115	MW	0.10789	1.15607	MW	0.179962	0.926	ND	0.637777	0.984052
0.57062	ND	0.661135	1.15934	MW	0.171279	1.0423	MW	0.0885191	0.906561	ND	0.641276	1.24713	MW	0.179962	1.20024	MW	0.0989176	0.57062
0.392923	ND	0.661135	0.662297	ND	0.593697	0.782746	ND	0.683649	0.584192	ND	0.641276	0.788626	ND	0.576028	0.640671	ND	0.637777	0.782746
0.0866638	ND	0.661135	-0.0237745	ND	0.593697	0.140352	ND	0.683649	-0.128875	ND	0.641276	0.0665926	ND	0.576028	0.137903	ND	0.637777	0.140352
-0.109483	ND	0.661135	-0.529412	ND	0.593697	-0.408455	ND	0.683649	-0.480634	ND	0.641276	-0.353283	ND	0.576028	-0.526364	ND	0.637777	-0.408455
0.409243	ND	0.661135	-0.387324	ND	0.593697	-0.651084	ND	0.683649	-0.38678	ND	0.641276	-0.363685	ND	0.576028	-0.499176	ND	0.637777	-0.651084
-1.35793	MD	0.167163	-1.46328	MD	0.185266	-1.20217	MD	0.162011	-1.42867	MD	0.185169	-1.34974	MD	0.192604	-1.28348	MD	0.188726	-1.34974
-1.37902	MD	0.167163	-1.54192	SD	0.0267295	-1.55671	SD	0.0462887	-1.56252	SD	0.0249294	-1.48655	MD	0.192604	-1.75126	SD	0.0267087	-1.48655
-0.972389	ND	0.661135	-0.991469	ND	0.593697	-0.588644	ND	0.683649	-0.968207	ND	0.641276	-0.956074	ND	0.576028	-1.10272	MD	0.188726	-0.588644
-0.841253	ND	0.661135	-0.697827	ND	0.593697	-0.455958	ND	0.683649	-0.505908	ND	0.641276	-0.647224	ND	0.576028	-0.750281	ND	0.637777	-0.455958
0.117977	ND	0.661135	0.022609	ND	0.593697	0.152526	ND	0.683649	0.0285509	ND	0.641276	0.101999	ND	0.576028	0.0298922	ND	0.637777	0.152526
0.248494	ND	0.661135	0.674918	ND	0.593697	0.635849	ND	0.683649	0.575332	ND	0.641276	0.764012	ND	0.576028	0.465831	ND	0.637777	0.635849
1.52183	SW	0.0336097	1.35255	MW	0.171279	1.03456	MW	0.0885191	2.15883	EW	0.0159084	1.72818	SW	0.0246556	1.49173	MW	0.0989176	1.35255
0.438501	ND	0.661135	1.0924	MW	0.171279	1.04994	MW	0.0885191	0.949357	ND	0.641276	1.14968	MW	0.179962	0.897267	ND	0.637777	0.438501
1.2918	MW	0.0866128	1.20626	MW	0.171279	0.786238	ND	0.683649	1.03296	MW	0.10789	1.14598	MW	0.179962	1.05166	MW	0.0989176	0.786238
1.4022	MW	0.0866128	0.567516	ND	0.593697	0.58917	ND	0.683649	0.992907	ND	0.641276	0.653399	ND	0.576028	1.19744	MW	0.0989176	0.58917
1.05248	MW	0.0866128	-0.0833781	ND	0.593697	-0.0612234	ND	0.683649	0.194807	ND	0.641276	0.12605	ND	0.576028	0.0664052	ND	0.637777	-0.0612234
-0.760317	ND	0.661135	-0.60758	ND	0.593697	-0.694125	ND	0.683649	-0.889369	ND	0.641276	-0.752756	ND	0.576028	-0.79592	ND	0.637777	-0.694125
-0.957302	ND	0.661135	-1.19309	MD	0.185266	-1.10558	MD	0.162011	-1.01244	MD	0.185169	-1.22718	MD	0.192604	-1.01781	MD	0.188726	-0.957302
-1.47742	MD	0.167163	-1.42756	MD	0.185266	-1.55731	SD	0.0462887	-1.26728	MD	0.185169	-1.28398	MD	0.192604	-1.4937	MD	0.188726	-1.28398
-0.90433	ND	0.661135	0.358679	ND	0.593697	-0.332848	ND	0.683649	-0.876963	ND	0.641276	-0.56797	ND	0.576028	-1.13969	MD	0.188726	-0.332848
-0.803296	ND	0.661135	-0.686368	ND	0.593697	-0.285629	ND	0.683649	-0.555283	ND	0.641276	-0.527765	ND	0.576028	-0.677338	ND	0.637777	-0.285629
-0.374745	ND	0.661135	-0.117974	ND	0.593697	-0.108138	ND	0.683649	-0.104938	ND	0.641276	-0.0724706	ND	0.576028	-0.152413	ND	0.637777	-0.108138
1.40386	MW	0.0866128	1.75213	SW	0.0159668	0.622081	ND	0.683649	1.51077	SW	0.0248265	1.05045	MW	0.179962	1.47125	MW	0.0989176	0.622081
1.44941	MW	0.0866128	1.34219	MW	0.171279	1.00828	MW	0.0885191	1.31559	MW	0.10789	1.54755	SW	0.0246556	0.971134	ND	0.637777	0.971134
0.465929	ND	0.661135	1.01745	MW	0.171279	0.96504	ND	0.683649	0.848646	ND	0.641276	1.10967	MW	0.179962	0.951014	ND	0.637777	0.96504
0.579966	ND	0.661135	0.807925	ND	0.593697	0.898339	ND	0.683649	0.683427	ND	0.641276	0.842931	ND	0.576028	0.966375	ND	0.637777	0.898339
0.40039	ND	0.661135	0.157829	ND	0.593697	0.383652	ND	0.683649	0.287578	ND	0.641276	0.320976	ND	0.576028	0.347827	ND	0.637777	0.383652
1.38445	MW	0.0866128	1.05943	MW	0.171279	-0.0179192	ND	0.683649	0.510992	ND	0.641276	0.285708	ND	0.576028	0.543387	ND	0.637777	-0.0179192
-0.0952521	ND	0.661135	-0.794877	ND	0.593697	-0.661597	ND	0.683649	-0.63591	ND	0.641276	-0.649544	ND	0.576028	-0.295351	ND	0.637777	-0.661597
-0.726064	ND	0.661135	-1.09493	MD	0.185266	-0.767212	ND	0.683649	-0.722765	ND	0.641276	-1.01251	MD	0.192604	-0.676809	ND	0.637777	-0.767212
-1.13664	MD	0.167163	-1.43178	MD	0.185266	-1.17417	MD	0.162011	-1.39524	MD	0.185169	-1.22077	MD	0.192604	-1.41252	MD	0.188726	-1.22077
-1.23062	MD	0.167163	-1.16295	MD	0.185266	-1.27287	MD	0.162011	-1.07229	MD	0.185169	-1.28728	MD	0.192604	-1.38742	MD	0.188726	-1.28728
-0.837378	ND	0.661135	-0.866707	ND	0.593697	-0.747122	ND	0.683649	-0.752938	ND	0.641276	-0.716753	ND	0.576028	-0.81119	ND	0.637777	-0.747122
2.33139	EW	0.0301253	0.5	EW	0.00706124	0.390785	ND	0.683649	3.77002	EW	0.0159084	2.68865	EW	0.00178337	1.75264	SW	0.0319554	0.390785
0.0473874	ND	0.661135	0.652769	ND	0.593697	0.509756	ND	0.683649	0.556622	ND	0.641276	0.726469	ND	0.576028	0.461657	ND	0.637777	0.509756
0.331738	ND	0.661135	1.01122	MW	0.171279	0.909457	ND	0.683649	1.23767	MW	0.10789	1.06569	MW	0.179962	0.67528	ND	0.637777	0.909457
0.802495	ND	0.661135	1.10946	MW	0.171279	1.03548	MW	0.0885191	0.91133	ND	0.641276	1.14146	MW	0.179962	1.66001	SW	0.0319554	0.802495
1.44293	MW	0.0866128	1.01122	MW	0.171279	0.825946	ND	0.683649	1.20538	MW	0.10789	1.05025	MW	0.179962	1.11003	MW	0.0989176	0.825946
1.53547	SW	0.0336097	0.361721	ND	0.593697	0.454404	ND	0.683649	1.04138	MW	0.10789	0.809641	ND	0.576028	1.62079	SW	0.0319554	0.454404
-0.262113	ND	0.661135	-0.315179	ND	0.593697	-0.434787	ND	0.683649	-0.203784	ND	0.641276	-0.408973	ND	0.576028	-0.262645	ND	0.637777	-0.434787
-1.18923	MD	0.167163	-1.27183	MD	0.185266	-1.06762	MD	0.162011	-1.16639	MD	0.185169	-1.31343	MD	0.192604	-1.04765	MD	0.188726	-1.31343
-0.782286	ND	0.661135	-0.939806	ND	0.593697	-0.996972	ND	0.683649	-1.06341	MD	0.185169	-1.21566	MD	0.192604	-0.958455	ND	0.637777	-0.996972
-1.30362	MD	0.167163	-1.19012	MD	0.185266	-1.33359	MD	0.162011	-1.06888	MD	0.185169	-1.14087	MD	0.192604	-1.29775	MD	0.188726	-1.14087
-0.796561	ND	0.661135	-0.837602	ND	0.593697	-0.633585	ND	0.683649	-0.576604	ND	0.641276	-0.968253	ND	0.576028	-1.07852	MD	0.188726	-0.633585
-0.788717	ND	0.661135	-0.798534	ND	0.593697	-0.443397	ND	0.683649	-0.702927	ND	0.641276	-0.683224	ND	0.576028	-0.246682	ND	0.637777	-0.443397
-0.0811678	ND	0.661135	0.0387122	ND	0.593697	0.153598	ND	0.683649	0.00466583	ND	0.641276	0.206803	ND	0.576028	0.0689242	ND	0.637777	0.153598
0.00566373	ND	0.661135	0.551802	ND	0.593697	0.428686	ND	0.683649	0.438857	ND	0.641276	0.622627	ND	0.576028	0.403791	ND	0.637777	0.428686
0.913047	ND	0.661135	1.05679	MW	0.171279	1.16823	MW	0.0885191	1.28319	MW	0.10789	1.14717	MW	0.179962	1.08946	MW	0.0989176	0.913047
1.04139	MW	0.0866128	1.04588	MW	0.171279	0.965011	ND	0.683649	0.938132	ND	0.641276	1.15577	MW	0.179962	0.823274	ND	0.637777	0.965011
0.748842	ND	0.661135	0.884036	ND	0.593697	0.883049	ND	0.683649	1.01887	MW	0.10789	0.992161	ND	0.576028	0.857632	ND	0.637777	0.883049
0.309759	ND	0.661135	0.275618	ND	0.593697	0.349907	ND	0.683649	0.240333	ND	0.641276	0.364756	ND	0.576028	0.432962	ND	0.637777	0.349907
0.566005	ND	0.661135	-0.280892	ND	0.593697	-0.169954	ND	0.683649	-0.101599	ND	0.641276	-0.301461	ND	0.576028	-0.0609686	ND	0.637777	-0.169954
1.52372	SW	0.0336097	0.123938	ND	0.593697	0.813834	ND	0.683649	0.619376	ND	0.641276	0.25326	ND	0.576028	-0.129652	ND	0.637777	0.813834
-1.1338	MD	0.167163	-1.29117	MD	0.185266	-1.26719	MD	0.162011	-1.39738	MD	0.185169	-1.30847	MD	0.192604	-1.14321	MD	0.188726	-1.30847
-0.602258	ND	0.661135	-0.82094	ND	0.593697	-1.03203	MD	0.162011	-0.693085	ND	0.641276	-0.7797	ND	0.576028	-1.09371	MD	0.188726	-0.602258
-0.818177	ND	0.661135	-0.421506	ND	0.593697	-0.714405	ND	0.683649	-0.649665	ND	0.641276	-0.418186	ND	0.576028	-0.8386	ND	0.637777	-0.714405
-0.801012	ND	0.661135	-0.749072	ND	0.593697	-0.604897	ND	0.683649	-0.51526	ND	0.641276	-0.638847	ND	0.576028	-0.819913	ND	0.637777	-0.604897
-0.0894532	ND	0.661135	-0.130992	ND	0.593697	-0.11825	ND	0.683649	0.00939527	ND	0.641276	-0.0377051	ND	0.576028	0.0145115	ND	0.637777	-0.11825
0.280404	ND	0.661135	0.761269	ND	0.593697	0.667309	ND	0.683649	0.736933	ND	0.641276	0.841654	ND	0.576028	0.664929	ND	0.637777	0.667309
0.416231	ND	0.661135	1.05891	MW	0.171279	1.06971	MW	0.0885191	0.967816	ND	0.641276	1.10858	MW	0.179962	0.772128	ND	0.637777	0.416231
1.16828	MW	0.0866128	1.19509	MW	0.171279	0.948522	ND	0.683649	1.24605	MW	0.10789	1.17251	MW	0.179962	1.57325	SW	0.0319554	0.948522
1.04211	MW	0.0866128	0.881223	ND	0.593697	0.916919	ND	0.683649	1.09406	MW	0.10789	1.15803	MW	0.179962	1.32813	MW	0.0989176	0.916919
1.22429	MW	0.0866128	0.315703	ND	0.593697	0.474589	ND	0.683649	1.11507	MW	0.10789	0.364054	ND	0.576028	1.03647	MW	0.0989176	0.474589
0.346319	ND	0.661135	-0.273017	ND	0.593697	-0.490115	ND	0.683649	0.0311579	ND	0.641276	-0.0873073	ND	0.576028	0.109812	ND	0.637777	-0.490115
-1.05385	MD	0.167163	-1.40417	MD	0.185266	-1.33455	MD	0.162011	-1.25063	MD	0.185169	-1.46655	MD	0.192604	-1.21501	MD	0.188726	-1.46655
-1.17089	MD	0.167163	-1.37307	MD	0.185266	-1.05423	MD	0.162011	-1.20859	MD	0.185169	-1.35523	MD	0.192604	-1.51303	SD	0.0267087	-1.35523
-1.63844	SD	0.0213547	-1.45282	MD	0.185266	-1.88906	SD	0.0462887	-1.46497	MD	0.185169	-1.56802	SD	0.0249672	-1.40385	MD	0.188726	-1.40385
-0.99568	ND	0.661135	-1.30277	MD	0.185266	-1.39333	MD	0.162011	-0.924913	ND	0.641276	-1.30433	MD	0.192604	-1.42735	MD	0.188726	-0.99568
-0.954061	ND	0.661135	-0.853251	ND	0.593697	-0.807147	ND	0.683649	-0.568559	ND	0.641276	-0.797943	ND	0.576028	-0.771574	ND	0.637777	-0.807147
-0.0631146	ND	0.661135	-0.0757543	ND	0.593697	-0.0843931	ND	0.683649	0.0756973	ND	0.641276	0.0872889	ND	0.576028	-0.064105	ND	0.637777	-0.0843931
0.0967042	ND	0.661135	0.55748	ND	0.593697	0.403116	ND	0.683649	0.568225	ND	0.641276	0.652122	ND	0.576028	0.4204	ND	0.637777	0.403116
1.72514	SW	0.0336097	1.58048	SW	0.0159668	0.857931	ND	0.683649	2.83224	EW	0.0159084	1.52313	SW	0.0246556	1.3047	MW	0.0989176	0.857931
0.85122	ND	0.661135	1.1165	MW	0.171279	1.26105	MW	0.0885191	1.09198	MW	0.10789	1.20326	MW	0.179962	1.38967	MW	0.0989176	0.85122
0.945391	ND	0.661135	1.01915	MW	0.171279	1.07904	MW	0.0885191	1.28574	MW	0.10789	1.15971	MW	0.179962	0.932041	ND	0.637777	0.945391
2.2223	EW	0.0301253	0.375633	ND	0.593697	0.555862	ND	0.683649	1.01932	MW	0.10789	0.693555	ND	0.576028	0.83178	ND	0.637777	0.555862
0.18946	ND	0.661135	-0.43867	ND	0.593697	-0.00225149	ND	0.683649	-0.12875	ND	0.641276	-0.190396	ND	0.576028	-0.163531	ND	0.637777	-0.00225149
1.23194	MW	0.0866128	-0.5252	ND	0.593697	-0.189061	ND	0.683649	-0.181288	ND	0.641276	-0.259681	ND	0.576028	-0.307041	ND	0.637777	-0.189061
-1.49594	MD	0.167163	-1.43288	MD	0.185266	-1.4098	MD	0.162011	-1.37465	MD	0.185169	-1.33202	MD	0.192604	-1.49874	MD	0.188726	-1.33202
-1.2029	MD	0.167163	-1.07341	MD	0.185266	-1.23428	MD	0.162011	-1.04201	MD	0.185169	-1.20253	MD	0.192604	-1.52035	SD	0.0267087	-1.20253
-1.19485	MD	0.167163	-1.23147	MD	0.185266	-1.52482	SD	0.0462887	-1.1001	MD	0.185169	-1.29832	MD	0.192604	-1.39991	MD	0.188726	-1.29832
-0.764116	ND	0.661135	-0.649615	ND	0.593697	-0.740428	ND	0.683649	-0.460053	ND	0.641276	-0.533911	ND	0.576028	-0.813133	ND	0.637777	-0.740428
-0.347338	ND	0.661135	0.071358	ND	0.593697	0.0218367	ND	0.683649	0.0916468	ND	0.641276	0.0957091	ND	0.576028	-0.0348166	ND	0.637777	0.0218367
0.173272	ND	0.661135	0.62657	ND	0.593697	0.511477	ND	0.683649	0.614492	ND	0.641276	0.711676	ND	0.576028	0.479704	ND	0.637777	0.511477
0.564161	ND	0.661135	1.07587	MW	0.171279	0.880467	ND	0.683649	0.973211	ND	0.641276	1.11872	MW	0.179962	0.833604	ND	0.637777	0.880467
2.44967	EW	0.0301253	1.29179	MW	0.171279	1.32764	MW	0.0885191	1.70493	SW	0.0248265	1.31099	MW	0.179962	1.86812	SW	0.0319554	1.31099
0.765023	ND	0.661135	0.912651	ND	0.593697	0.900745	ND	0.683649	0.969902	ND	0.641276	1.03448	MW	0.179962	1.17704	MW	0.0989176	0.900745
2.13879	EW	0.0301253	0.675613	ND	0.593697	0.882952	ND	0.683649	1.23921	MW	0.10789	0.647337	ND	0.576028	1.06915	MW	0.0989176	0.882952
0.46692	ND	0.661135	-0.502856	ND	0.593697	0.955667	ND	0.683649	0.640555	ND	0.641276	-0.136343	ND	0.576028	-0.243921	ND	0.637777	0.955667
-0.255886	ND	0.661135	-0.965919	ND	0.593697	-0.912498	ND	0.683649	-0.887552	ND	0.641276	-0.956939	ND	0.576028	-0.979314	ND	0.637777	-0.912498
-1.34364	MD	0.167163	-1.29819	MD	0.185266	-1.42035	MD	0.162011	-1.29455	MD	0.185169	-1.46708	MD	0.192604	-1.42223	MD	0.188726	-1.46708
-1.3428	MD	0.167163	-1.18417	MD	0.185266	-1.49699	MD	0.162011	-1.07102	MD	0.185169	-1.47772	MD	0.192604	-1.56472	SD	0.0267087	-1.47772
-1.23896	MD	0.167163	-0.871974	ND	0.593697	-1.12474	MD	0.162011	-0.974995	ND	0.641276	-1.22149	MD	0.192604	-1.29498	MD	0.188726	-0.974995
1.78263	SW	0.0336097	0.52181	ND	0.593697	1.5719	SW	0.0141916	1.64963	SW	0.0248265	0.383384	ND	0.576028	0.615588	ND	0.637777	0.615588
-0.0997341	ND	0.661135	0.0905466	ND	0.593697	0.645222	ND	0.683649	0.0931557	ND	0.641276	0.122736	ND	0.576028	-0.0168292	ND	0.637777	0.645222
0.204362	ND	0.661135	0.623898	ND	0.593697	0.505564	ND	0.683649	0.646031	ND	0.641276	0.68808	ND	0.576028	0.460297	ND	0.637777	0.505564
0.464391	ND	0.661135	1.01179	MW	0.171279	0.918198	ND	0.683649	0.927568	ND	0.641276	1.04263	MW	0.179962	0.798225	ND	0.637777	0.918198
0.91217	ND	0.661135	1.26259	MW	0.171279	1.04851	MW	0.0885191	1.06209	MW	0.10789	1.13265	MW	0.179962	1.32603	MW	0.0989176	0.91217
0.998539	ND	0.661135	0.888237	ND	0.593697	0.696748	ND	0.683649	1.05497	MW	0.10789	0.767191	ND	0.576028	0.810024	ND	0.637777	0.696748
1.34983	MW	0.0866128	0.574935	ND	0.593697	1.32171	MW	0.0885191	0.807933	ND	0.641276	0.322078	ND	0.576028	1.04143	MW	0.0989176	0.807933
-0.737368	ND	0.661135	-0.604418	ND	0.593697	-0.547904	ND	0.683649	-0.52951	ND	0.641276	-0.620195	ND	0.576028	-0.462476	ND	0.637777	-0.547904
-0.226628	ND	0.661135	-0.517333	ND	0.593697	-0.946601	ND	0.683649	-0.842037	ND	0.641276	-0.889262	ND	0.576028	-0.505309	ND	0.637777	-0.946601
-0.904748	ND	0.661135	-0.794384	ND	0.593697	-1.12365	MD	0.162011	-1.19622	MD	0.185169	-1.31751	MD	0.192604	-1.09544	MD	0.188726	-0.904748
-0.542165	ND	0.661135	-0.0801905	ND	0.593697	-0.323861	ND	0.683649	-0.677431	ND	0.641276	-0.773981	ND	0.576028	-0.996007	ND	0.637777	-0.323861
-1.22999	MD	0.167163	-0.86222	ND	0.593697	-0.966007	ND	0.683649	-1.07893	MD	0.185169	-1.17064	MD	0.192604	-1.2486	MD	0.188726	-0.966007
-0.644656	ND	0.661135	-0.588317	ND	0.593697	-0.70042	ND	0.683649	-0.557376	ND	0.641276	-0.745551	ND	0.576028	-0.673401	ND	0.637777	-0.70042
-0.170593	ND	0.661135	0.0993904	ND	0.593697	0.419718	ND	0.683649	0.189958	ND	0.641276	0.0287983	ND	0.576028	-0.12132	ND	0.637777	0.419718
1.75551	SW	0.0336097	1.23084	MW	0.171279	1.05691	MW	0.0885191	1.58862	SW	0.0248265	1.26728	MW	0.179962	1.11997	MW	0.0989176	1.26728
0.298814	ND	0.661135	0.992131	ND	0.593697	0.868957	ND	0.683649	0.919291	ND	0.641276	1.02535	MW	0.179962	0.655477	ND	0.637777	0.868957
1.1744	MW	0.0866128	1.23551	MW	0.171279	1.09912	MW	0.0885191	1.13577	MW	0.10789	1.20404	MW	0.179962	1.65606	SW	0.0319554	1.20404
1.0763	MW	0.0866128	1.16148	MW	0.171279	0.840261	ND	0.683649	1.39642	MW	0.10789	1.16226	MW	0.179962	1.22449	MW	0.0989176	0.840261
1.24457	MW	0.0866128	0.391803	ND	0.593697	0.649147	ND	0.683649	0.861181	ND	0.641276	0.559282	ND	0.576028	1.16322	MW	0.0989176	0.649147
0.977017	ND	0.661135	-0.104048	ND	0.593697	-0.282021	ND	0.683649	0.269558	ND	0.641276	-0.180857	ND	0.576028	0.24728	ND	0.637777	-0.282021
-0.569248	ND	0.661135	-0.56018	ND	0.593697	-1.06603	MD	0.162011	-0.637702	ND	0.641276	-0.642542	ND	0.576028	-0.870771	ND	0.637777	-0.569248
-1.03268	MD	0.167163	-0.721752	ND	0.593697	-0.343873	ND	0.683649	-1.11851	MD	0.185169	-1.29957	MD	0.192604	-1.37468	MD	0.188726	-0.343873
-1.292	MD	0.167163	-0.971951	ND	0.593697	-1.66337	SD	0.0462887	-1.59672	SD	0.0249294	-1.47958	MD	0.192604	-1.67019	SD	0.0267087	-0.971951
-1.00796	MD	0.167163	-1.14372	MD	0.185266	-1.52178	SD	0.0462887	-1.02253	MD	0.185169	-1.35933	MD	0.192604	-1.18746	MD	0.188726	-1.35933
-0.504699	ND	0.661135	-0.34808	ND	0.593697	-0.37829	ND	0.683649	-0.337147	ND	0.641276	-0.394697	ND	0.576028	-0.516051	ND	0.637777	-0.37829
-0.171707	ND	0.661135	0.128347	ND	0.593697	0.55504	ND	0.683649	0.14798	ND	0.641276	0.115175	ND	0.576028	-0.0718928	ND	0.637777	0.55504
0.0809515	ND	0.661135	0.620379	ND	0.593697	0.789511	ND	0.683649	0.589772	ND	0.641276	0.677789	ND	0.576028	0.388583	ND	0.637777	0.789511
2.81885	EW	0.0301253	2.76801	EW	0.00706124	1.4847	MW	0.0885191	1.74515	SW	0.0248265	1.38471	MW	0.179962	2.07212	EW	0.015915	1.38471
0.686204	ND	0.661135	1.17085	MW	0.171279	0.919312	ND	0.683649	1.01492	MW	0.10789	1.18904	MW	0.179962	1.18357	MW	0.0989176	0.919312
1.12379	MW	0.0866128	1.04082	MW	0.171279	0.877365	ND	0.683649	0.987547	ND	0.641276	0.942888	ND	0.576028	1.30097	MW	0.0989176	0.877365
0.503283	ND	0.661135	0.228894	ND	0.593697	1.49215	MW	0.0885191	0.269835	ND	0.641276	0.252694	ND	0.576028	0.296709	ND	0.637777	0.503283
0.795819	ND	0.661135	-0.0365107	ND	0.593697	0.0925842	ND	0.683649	0.266886	ND	0.641276	0.173206	ND	0.576028	0.0149543	ND	0.637777	0.0925842
-0.671115	ND	0.661135	-1.04869	MD	0.185266	0.663862	ND	0.683649	-0.890568	ND	0.641276	-0.778324	ND	0.576028	-0.818515	ND	0.637777	0.663862
-0.839004	ND	0.661135	-1.15097	MD	0.185266	0.0739679	ND	0.683649	-1.27174	MD	0.185169	-1.22695	MD	0.192604	-1.3596	MD	0.188726	0.0739679
-0.695118	ND	0.661135	-0.473584	ND	0.593697	-1.59456	SD	0.0462887	-1.17933	MD	0.185169	-1.31439	MD	0.192604	-0.822507	ND	0.637777	-0.695118
-1.33432	MD	0.167163	-0.983283	ND	0.593697	-1.06697	MD	0.162011	-0.890381	ND	0.641276	-1.23517	MD	0.192604	-1.07917	MD	0.188726	-0.890381
-0.877161	ND	0.661135	-0.743609	ND	0.593697	-0.608915	ND	0.683649	-0.439127	ND	0.641276	-0.58857	ND	0.576028	-0.588854	ND	0.637777	-0.608915
0.031291	ND	0.661135	0.313815	ND	0.593697	0.212703	ND	0.683649	0.144037	ND	0.641276	0.176773	ND	0.576028	-0.0360681	ND	0.637777	0.212703
0.255558	ND	0.661135	0.592102	ND	0.593697	0.462572	ND	0.683649	0.703324	ND	0.641276	0.669705	ND	0.576028	0.392974	ND	0.637777	0.462572
0.811507	ND	0.661135	1.15408	MW	0.171279	0.935975	ND	0.683649	1.04816	MW	0.10789	1.32707	MW	0.179962	0.965227	ND	0.637777	0.935975
0.88742	ND	0.661135	1.26182	MW	0.171279	0.948631	ND	0.683649	2.55588	EW	0.0159084	1.56789	SW	0.0246556	1.73327	SW	0.0319554	0.948631
1.00386	MW	0.0866128	1.05862	MW	0.171279	0.732623	ND	0.683649	1.06533	MW	0.10789	0.968309	ND	0.576028	1.66228	SW	0.0319554	0.732623
3.03039	EW	0.0301253	0.762266	ND	0.593697	1.3869	MW	0.0885191	2.33936	EW	0.0159084	0.950696	ND	0.576028	1.37925	MW	0.0989176	0.762266
1.94025	SW	0.0336097	0.646735	ND	0.593697	0.582536	ND	0.683649	1.23786	MW	0.10789	0.171358	ND	0.576028	0.580471	ND	0.637777	0.582536
1.79581	SW	0.0336097	0.619418	ND	0.593697	0.948014	ND	0.683649	2.18482	EW	0.0159084	0.504204	ND	0.576028	0.5469	ND	0.637777	0.948014
0.199372	ND	0.661135	-0.805265	ND	0.593697	-0.0786294	ND	0.683649	-0.306296	ND	0.641276	-0.678169	ND	0.576028	-0.686363	ND	0.637777	-0.0786294
-1.25848	MD	0.167163	-1.14107	MD	0.185266	-1.26289	MD	0.162011	-1.29129	MD	0.185169	-1.41334	MD	0.192604	-1.36469	MD	0.188726	-1.41334
-0.949124	ND	0.661135	-1.10508	MD	0.185266	-0.86542	ND	0.683649	-0.90539	ND	0.641276	-1.14503	MD	0.192604	-0.549897	ND	0.637777	-0.86542
-0.988376	ND	0.661135	-0.830544	ND	0.593697	-0.92789	ND	0.683649	-0.738788	ND	0.641276	-0.912587	ND	0.576028	-0.805969	ND	0.637777	-0.92789
0.430211	ND	0.661135	0.29721	ND	0.593697	0.409585	ND	0.683649	0.230041	ND	0.641276	0.18394	ND	0.576028	0.148491	ND	0.637777	0.409585
0.119208	ND	0.661135	0.603656	ND	0.593697	0.573415	ND	0.683649	0.599344	ND	0.641276	0.684938	ND	0.576028	0.43322	ND	0.637777	0.573415
0.416398	ND	0.661135	1.0783	MW	0.171279	0.916395	ND	0.683649	0.899336	ND	0.641276	1.07466	MW	0.179962	0.946962	ND	0.637777	0.916395
0.410559	ND	0.661135	0.992293	ND	0.593697	0.832637	ND	0.683649	0.865343	ND	0.641276	1.0053	MW	0.179962	0.796547	ND	0.637777	0.832637
0.200466	ND	0.661135	0.717536	ND	0.593697	0.681158	ND	0.683649	0.644072	ND	0.641276	0.747764	ND	0.576028	0.701175	ND	0.637777	0.681158
1.18044	MW	0.0866128	0.399775	ND	0.593697	0.618974	ND	0.683649	0.884442	ND	0.641276	0.452358	ND	0.576028	0.540173	ND	0.637777	0.618974
-0.199853	ND	0.661135	-0.342251	ND	0.593697	0.179762	ND	0.683649	-0.0401264	ND	0.641276	-0.530653	ND	0.576028	-0.511057	ND	0.637777	0.179762
-0.414635	ND	0.661135	-0.833518	ND	0.593697	-0.210486	ND	0.683649	-0.866245	ND	0.641276	-0.951604	ND	0.576028	-0.790077	ND	0.637777	-0.210486
-1.26636	MD	0.167163	-1.29882	MD	0.185266	-1.37782	MD	0.162011	-1.30289	MD	0.185169	-1.332	MD	0.192604	-1.12629	MD	0.188726	-1.332
-1.22217	MD	0.167163	-1.4116	MD	0.185266	-1.557	SD	0.0462887	-1.55725	SD	0.0249294	-1.6593	SD	0.0249672	-1.81575	SD	0.0267087	-1.4116
0.102226	ND	0.661135	-0.0208855	ND	0.593697	1.16882	MW	0.0885191	0.102171	ND	0.641276	-0.164625	ND	0.576028	-0.503006	ND	0.637777	0.102226
-0.767164	ND	0.661135	-0.704285	ND	0.593697	-0.661413	ND	0.683649	-0.60132	ND	0.641276	-0.699982	ND	0.576028	-0.628451	ND	0.637777	-0.661413
-0.21682	ND	0.661135	0.152794	ND	0.593697	0.0687335	ND	0.683649	0.123204	ND	0.641276	0.145519	ND	0.576028	-0.0175593	ND	0.637777	0.0687335
0.610586	ND	0.661135	0.743998	ND	0.593697	0.625269	ND	0.683649	0.668919	ND	0.641276	0.776473	ND	0.576028	0.597422	ND	0.637777	0.625269
0.602756	ND	0.661135	1.08674	MW	0.171279	0.939511	ND	0.683649	0.981918	ND	0.641276	1.15951	MW	0.179962	0.893789	ND	0.637777	0.939511
0.854971	ND	0.661135	1.39069	MW	0.171279	0.893421	ND	0.683649	1.16419	MW	0.10789	1.24011	MW	0.179962	1.96669	SW	0.0319554	0.893421
1.52983	SW	0.0336097	0.986967	ND	0.593697	1.0968	MW	0.0885191	1.19829	MW	0.10789	1.05381	MW	0.179962	1.31734	MW	0.0989176	0.986967
0.231691	ND	0.661135	0.172114	ND	0.593697	0.403056	ND	0.683649	0.286422	ND	0.641276	0.311801	ND	0.576028	0.648381	ND	0.637777	0.403056
0.871297	ND	0.661135	0.244009	ND	0.593697	0.381459	ND	0.683649	0.816705	ND	0.641276	0.303825	ND	0.576028	0.224539	ND	0.637777	0.381459
0.142765	ND	0.661135	-0.384948	ND	0.593697	-0.232196	ND	0.683649	-0.176106	ND	0.641276	-0.363944	ND	0.576028	-0.0349457	ND	0.637777	-0.232196
-0.978741	ND	0.661135	-1.01344	MD	0.185266	0.918323	ND	0.683649	-1.01538	MD	0.185169	-0.855074	ND	0.576028	-1.07127	MD	0.188726	0.918323
-1.61091	SD	0.0213547	-1.44257	MD	0.185266	-1.58332	SD	0.0462887	-1.5449	SD	0.0249294	-1.6328	SD	0.0249672	-1.6607	SD	0.0267087	-1.44257
-1.37083	MD	0.167163	-1.11997	MD	0.185266	-0.755931	ND	0.683649	-1.18655	MD	0.185169	-1.2652	MD	0.192604	-1.36169	MD	0.188726	-0.755931
-0.655087	ND	0.661135	-0.461376	ND	0.593697	-0.369262	ND	0.683649	-0.587128	ND	0.641276	-0.535844	ND	0.576028	-0.487483	ND	0.637777	-0.369262
-0.423649	ND	0.661135	-0.158052	ND	0.593697	-0.142476	ND	0.683649	-0.0463644	ND	0.641276	-0.0983795	ND	0.576028	-0.0839292	ND	0.637777	-0.142476
-0.0196553	ND	0.661135	0.519212	ND	0.593697	0.352834	ND	0.683649	0.522817	ND	0.641276	0.557119	ND	0.576028	0.338853	ND	0.637777	0.352834
0.195768	ND	0.661135	0.901589	ND	0.593697	0.726339	ND	0.683649	0.850542	ND	0.641276	0.951592	ND	0.576028	0.879849	ND	0.637777	0.726339
1.956	SW	0.0336097	1.34616	MW	0.171279	0.870658	ND	0.683649	1.1763	MW	0.10789	1.112	MW	0.179962	1.59642	SW	0.0319554	0.870658
0.709147	ND	0.661135	1.10985	MW	0.171279	0.5	ND	0.683649	1.02236	MW	0.10789	1.60028	SW	0.0246556	1.162	MW	0.0989176	0.5
1.20968	MW	0.0866128	0.353397	ND	0.593697	0.819089	ND	0.683649	0.540802	ND	0.641276	0.386746	ND	0.576028	0.392792	ND	0.637777	0.819089
2.63903	EW	0.0301253	0.576124	ND	0.593697	0.5	ND	0.683649	0.756889	ND	0.641276	1.1164	MW	0.179962	0.991731	ND	0.637777	0.5
-0.391332	ND	0.661135	-0.878726	ND	0.593697	-1.0271	MD	0.162011	-0.91905	ND	0.641276	-0.958585	ND	0.576028	-0.471312	ND	0.637777	-0.391332
-1.19088	MD	0.167163	-1.41614	MD	0.185266	-1.4027	MD	0.162011	-1.3696	MD	0.185169	-1.4783	MD	0.192604	-1.30189	MD	0.188726	-1.4783
-1.23246	MD	0.167163	-1.46074	MD	0.185266	-1.15812	MD	0.162011	-1.28977	MD	0.185169	-1.52596	SD	0.0249672	-1.37159	MD	0.188726	-1.37159
-0.462245	ND	0.661135	-0.695492	ND	0.593697	0.0856988	ND	0.683649	-0.821908	ND	0.641276	-0.90572	ND	0.576028	-0.691868	ND	0.637777	0.0856988
-0.513581	ND	0.661135	-0.701477	ND	0.593697	-0.8033	ND	0.683649	-0.598741	ND	0.641276	-0.647152	ND	0.576028	-0.664502	ND	0.637777	-0.8033
-0.329697	ND	0.661135	-0.102263	ND	0.593697	-0.079272	ND	0.683649	-0.0391476	ND	0.641276	0.0214586	ND	0.576028	0.0624458	ND	0.637777	-0.079272
0.915883	ND	0.661135	0.972444	ND	0.593697	0.623245	ND	0.683649	1.24148	MW	0.10789	0.904387	ND	0.576028	0.652971	ND	0.637777	0.623245
0.225915	ND	0.661135	0.903873	ND	0.593697	0.802564	ND	0.683649	0.830546	ND	0.641276	0.959406	ND	0.576028	0.676717	ND	0.637777	0.802564
1.20655	MW	0.0866128	1.13703	MW	0.171279	0.885365	ND	0.683649	1.17202	MW	0.10789	1.16163	MW	0.179962	1.67568	SW	0.0319554	0.885365
0.415174	ND	0.661135	0.794605	ND	0.593697	0.765889	ND	0.683649	0.735496	ND	0.641276	0.820721	ND	0.576028	0.838877	ND	0.637777	0.765889
0.245863	ND	0.661135	0.147625	ND	0.593697	0.176079	ND	0.683649	0.273471	ND	0.641276	0.13457	ND	0.576028	0.323279	ND	0.637777	0.176079
-0.193414	ND	0.661135	-0.556729	ND	0.593697	-0.160973	ND	0.683649	-0.259618	ND	0.641276	-0.429177	ND	0.576028	-0.264607	ND	0.637777	-0.160973
-1.3896	MD	0.167163	-1.48895	MD	0.185266	-1.27078	MD	0.162011	-1.33031	MD	0.185169	-1.51771	SD	0.0249672	-1.12929	MD	0.188726	-1.12929
-1.16688	MD	0.167163	-0.999293	ND	0.593697	-1.42349	MD	0.162011	-1.20613	MD	0.185169	-1.28234	MD	0.192604	-1.13613	MD	0.188726	-0.999293
-1.00143	MD	0.167163	-0.869165	ND	0.593697	-1.20113	MD	0.162011	-1.23048	MD	0.185169	-1.1211	MD	0.192604	-1.00603	MD	0.188726	-0.869165
-1.21137	MD	0.167163	-1.08868	MD	0.185266	-1.27965	MD	0.162011	-1.01979	MD	0.185169	-1.1212	MD	0.192604	-0.830604	ND	0.637777	-0.830604
-0.758881	ND	0.661135	-0.721548	ND	0.593697	-0.647883	ND	0.683649	-0.572496	ND	0.641276	-0.612269	ND	0.576028	-0.491966	ND	0.637777	-0.647883
-0.267741	ND	0.661135	-0.0598855	ND	0.593697	-0.05942	ND	0.683649	-0.0932605	ND	0.641276	-0.0777022	ND	0.576028	-0.0400122	ND	0.637777	-0.05942
0.233595	ND	0.661135	0.590967	ND	0.593697	0.552337	ND	0.683649	0.583724	ND	0.641276	0.652267	ND	0.576028	0.509604	ND	0.637777	0.552337
0.594572	ND	0.661135	1.01321	MW	0.171279	0.899757	ND	0.683649	0.888923	ND	0.641276	1.13292	MW	0.179962	1.26076	MW	0.0989176	0.899757
0.26742	ND	0.661135	0.935724	ND	0.593697	0.786687	ND	0.683649	0.821969	ND	0.641276	0.972978	ND	0.576028	0.79441	ND	0.637777	0.786687
0.151596	ND	0.661135	0.683113	ND	0.593697	0.607164	ND	0.683649	0.608696	ND	0.641276	0.692822	ND	0.576028	0.530486	ND	0.637777	0.607164
0.453962	ND	0.661135	0.0657462	ND	0.593697	0.0619066	ND	0.683649	0.171636	ND	0.641276	0.152721	ND	0.576028	0.0125636	ND	0.637777	0.0619066
-0.00765694	ND	0.661135	-0.387664	ND	0.593697	-0.428219	ND	0.683649	-0.378869	ND	0.641276	-0.496231	ND	0.576028	-0.465518	ND	0.637777	-0.428219
-1.38519	MD	0.167163	-1.45169	MD	0.185266	-1.3801	MD	0.162011	-1.42428	MD	0.185169	-1.47518	MD	0.192604	-1.32834	MD	0.188726	-1.47518
-1.32197	MD	0.167163	-1.44989	MD	0.185266	-1.27896	MD	0.162011	-1.55391	SD	0.0249294	-1.30334	MD	0.192604	-1.3269	MD	0.188726	-1.30334
-1.20885	MD	0.167163	-1.74039	SD	0.0267295	-0.582427	ND	0.683649	-1.52584	SD	0.0249294	-1.41327	MD	0.192604	-1.48057	MD	0.188726	-0.582427
-1.19188	MD	0.167163	-1.57675	SD	0.0267295	-1.1847	MD	0.162011	-1.2925	MD	0.185169	-1.14881	MD	0.192604	-1.26128	MD	0.188726	-1.14881
-0.278828	ND	0.661135	-0.664545	ND	0.593697	-0.56522	ND	0.683649	-0.382279	ND	0.641276	-0.631795	ND	0.576028	-0.487505	ND	0.637777	-0.56522
0.181874	ND	0.661135	-0.205879	ND	0.593697	-0.0692499	ND	0.683649	-0.0647942	ND	0.641276	-0.128268	ND	0.576028	-0.0505359	ND	0.637777	-0.0692499
1.13916	MW	0.0866128	0.894471	ND	0.593697	0.710099	ND	0.683649	1.17286	MW	0.10789	0.994756	ND	0.576028	0.655972	ND	0.637777	0.710099
1.11491	MW	0.0866128	1.131	MW	0.171279	0.926903	ND	0.683649	0.921866	ND	0.641276	1.10066	MW	0.179962	1.22722	MW	0.0989176	0.926903
0.753028	ND	0.661135	1.00809	MW	0.171279	0.873664	ND	0.683649	1.03018	MW	0.10789	1.04784	MW	0.179962	0.793608	ND	0.637777	0.873664
1.16135	MW	0.0866128	0.996977	ND	0.593697	1.08845	MW	0.0885191	1.04999	MW	0.10789	0.972316	ND	0.576028	0.862844	ND	0.637777	0.862844
0.455537	ND	0.661135	0.276771	ND	0.593697	0.425776	ND	0.683649	0.342108	ND	0.641276	0.060721	ND	0.576028	0.352724	ND	0.637777	0.425776
1.79486	SW	0.0336097	0.145892	ND	0.593697	1.19143	MW	0.0885191	0.438981	ND	0.641276	0.0768791	ND	0.576028	0.0911094	ND	0.637777	0.438981
-0.991816	ND	0.661135	-0.916546	ND	0.593697	-0.902809	ND	0.683649	-0.775725	ND	0.641276	-1.06613	MD	0.192604	-0.955101	ND	0.637777	-0.902809
-0.937459	ND	0.661135	-1.05412	MD	0.185266	-0.716836	ND	0.683649	-1.02159	MD	0.185169	-1.22088	MD	0.192604	-1.16829	MD	0.188726	-0.716836
-1.22259	MD	0.167163	-1.32724	MD	0.185266	-1.22533	MD	0.162011	-1.39879	MD	0.185169	-1.27117	MD	0.192604	-1.36913	MD	0.188726	-1.27117
-1.22351	MD	0.167163	-0.638978	ND	0.593697	-0.664885	ND	0.683649	-0.994183	ND	0.641276	-1.08642	MD	0.192604	-1.04657	MD	0.188726	-0.664885
-0.566716	ND	0.661135	-0.371522	ND	0.593697	0.326922	ND	0.683649	-0.495526	ND	0.641276	-0.55327	ND	0.576028	-0.474791	ND	0.637777	0.326922
-0.397072	ND	0.661135	-0.0920972	ND	0.593697	-0.121137	ND	0.683649	-0.0384348	ND	0.641276	-0.129263	ND	0.576028	-0.158476	ND	0.637777	-0.121137
0.0360847	ND	0.661135	0.587947	ND	0.593697	0.471578	ND	0.683649	0.577542	ND	0.641276	0.616126	ND	0.576028	0.38145	ND	0.637777	0.471578
0.328581	ND	0.661135	1.04649	MW	0.171279	0.853088	ND	0.683649	0.939386	ND	0.641276	1.04243	MW	0.179962	0.711401	ND	0.637777	0.853088
0.290025	ND	0.661135	0.951207	ND	0.593697	0.775408	ND	0.683649	0.859643	ND	0.641276	0.950643	ND	0.576028	0.640864	ND	0.637777	0.775408
1.16058	MW	0.0866128	1.96199	SW	0.0159668	1.41019	MW	0.0885191	2.25666	EW	0.0159084	1.48053	MW	0.179962	0.866822	ND	0.637777	0.866822
0.443531	ND	0.661135	0.779542	ND	0.593697	1.04057	MW	0.0885191	0.821907	ND	0.641276	0.585711	ND	0.576028	0.693307	ND	0.637777	0.443531
0.991976	ND	0.661135	-0.0284136	ND	0.593697	0.685784	ND	0.683649	0.161115	ND	0.641276	-0.14107	ND	0.576028	0.238899	ND	0.637777	0.685784
0.847527	ND	0.661135	1.14062	MW	0.171279	0.741478	ND	0.683649	1.01116	MW	0.10789	0.376999	ND	0.576028	0.609727	ND	0.637777	0.741478
-1.28601	MD	0.167163	-1.36647	MD	0.185266	-1.51447	SD	0.0462887	-1.39728	MD	0.185169	-1.45059	MD	0.192604	-1.34346	MD	0.188726	-1.45059
-1.36036	MD	0.167163	-1.3058	MD	0.185266	-1.61305	SD	0.0462887	-1.50209	SD	0.0249294	-1.5264	SD	0.0249672	-1.51965	SD	0.0267087	-1.3058
-0.901053	ND	0.661135	-0.788988	ND	0.593697	-0.389827	ND	0.683649	-0.991823	ND	0.641276	-1.01292	MD	0.192604	-0.886985	ND	0.637777	-0.389827
0.372163	ND	0.661135	0.628267	ND	0.593697	0.440839	ND	0.683649	-0.163349	ND	0.641276	-0.302963	ND	0.576028	-0.245083	ND	0.637777	0.440839
-0.116142	ND	0.661135	0.0598839	ND	0.593697	0.296789	ND	0.683649	0.143243	ND	0.641276	0.120839	ND	0.576028	-0.101451	ND	0.637777	0.296789
0.28883	ND	0.661135	0.697141	ND	0.593697	0.533145	ND	0.683649	0.644669	ND	0.641276	0.73317	ND	0.576028	0.446341	ND	0.637777	0.533145
1.47784	MW	0.0866128	1.27375	MW	0.171279	0.852177	ND	0.683649	1.43691	MW	0.10789	1.18381	MW	0.179962	0.813	ND	0.637777	0.852177
1.74585	SW	0.0336097	1.21217	MW	0.171279	1.85825	SW	0.0141916	0.971243	ND	0.641276	1.09446	MW	0.179962	0.994338	ND	0.637777	0.971243
0.916919	ND	0.661135	0.80967	ND	0.593697	1.0529	MW	0.0885191	0.953545	ND	0.641276	0.858712	ND	0.576028	0.810366	ND	0.637777	0.916919
0.117776	ND	0.661135	0.0266827	ND	0.593697	0.358722	ND	0.683649	0.133638	ND	0.641276	-0.00725097	ND	0.576028	0.124005	ND	0.637777	0.358722
1.23586	MW	0.0866128	0.635267	ND	0.593697	1.79275	SW	0.0141916	0.483003	ND	0.641276	0.225416	ND	0.576028	-0.116151	ND	0.637777	0.483003
-0.718651	ND	0.661135	-0.871492	ND	0.593697	-0.12359	ND	0.683649	-0.952118	ND	0.641276	-0.95874	ND	0.576028	-1.03625	MD	0.188726	-0.12359
-0.687415	ND	0.661135	-1.00666	MD	0.185266	-0.820922	ND	0.683649	-1.11932	MD	0.185169	-1.12548	MD	0.192604	-1.12471	MD	0.188726	-0.820922
-1.28101	MD	0.167163	-1.24085	MD	0.185266	-1.21069	MD	0.162011	-1.13314	MD	0.185169	-1.34773	MD	0.192604	-1.46403	MD	0.188726	-1.34773
-0.798646	ND	0.661135	-0.82207	ND	0.593697	-0.402931	ND	0.683649	-0.859445	ND	0.641276	-0.997157	ND	0.576028	-1.00387	MD	0.188726	-0.402931
-0.898476	ND	0.661135	-0.769711	ND	0.593697	-0.508705	ND	0.683649	-0.654284	ND	0.641276	-0.720462	ND	0.576028	-0.815732	ND	0.637777	-0.508705
0.115322	ND	0.661135	0.198446	ND	0.593697	2.31126	EW	0.00534101	0.21194	ND	0.641276	0.247566	ND	0.576028	0.0399646	ND	0.637777	0.115322
0.226317	ND	0.661135	0.620242	ND	0.593697	0.678305	ND	0.683649	0.534104	ND	0.641276	0.632192	ND	0.576028	0.428818	ND	0.637777	0.678305
0.476768	ND	0.661135	1.19673	MW	0.171279	1.40919	MW	0.0885191	1.05692	MW	0.10789	1.87532	SW	0.0246556	0.957693	ND	0.637777	0.476768
1.13345	MW	0.0866128	2.01199	EW	0.00706124	1.55949	SW	0.0141916	1.50531	SW	0.0248265	1.43302	MW	0.179962	1.24118	MW	0.0989176	1.43302
1.93996	SW	0.0336097	1.09405	MW	0.171279	1.59998	SW	0.0141916	1.54883	SW	0.0248265	1.27462	MW	0.179962	1.30553	MW	0.0989176	1.27462
0.209962	ND	0.661135	0.142639	ND	0.593697	0.521273	ND	0.683649	0.421967	ND	0.641276	0.369993	ND	0.576028	0.400604	ND	0.637777	0.521273
0.702432	ND	0.661135	0.528138	ND	0.593697	0.5	ND	0.683649	0.247442	ND	0.641276	0.563079	ND	0.576028	0.568909	ND	0.637777	0.5
0.553337	ND	0.661135	-0.274122	ND	0.593697	0.191628	ND	0.683649	-0.290424	ND	0.641276	-0.458177	ND	0.576028	-0.134293	ND	0.637777	0.191628
-1.42733	MD	0.167163	-1.39705	MD	0.185266	-1.2852	MD	0.162011	-1.36261	MD	0.185169	-1.48456	MD	0.192604	-1.28529	MD	0.188726	-1.48456
-1.28248	MD	0.167163	-1.12033	MD	0.185266	-1.38137	MD	0.162011	-1.17845	MD	0.185169	-1.35973	MD	0.192604	-1.06566	MD	0.188726	-1.35973
-1.38941	MD	0.167163	-1.19574	MD	0.185266	-0.887271	ND	0.683649	-1.20737	MD	0.185169	-1.27832	MD	0.192604	-1.24615	MD	0.188726	-0.887271
-0.925915	ND	0.661135	-0.693927	ND	0.593697	-0.33059	ND	0.683649	-0.641512	ND	0.641276	-0.747257	ND	0.576028	-0.718918	ND	0.637777	-0.33059
-0.359208	ND	0.661135	-0.0259423	ND	0.593697	0.183595	ND	0.683649	-0.0987704	ND	0.641276	-0.060378	ND	0.576028	-0.0646288	ND	0.637777	0.183595
0.321201	ND	0.661135	0.786617	ND	0.593697	0.583159	ND	0.683649	0.753077	ND	0.641276	0.78612	ND	0.576028	0.50125	ND	0.637777	0.583159
0.812766	ND	0.661135	1.12849	MW	0.171279	0.880736	ND	0.683649	1.07878	MW	0.10789	1.0921	MW	0.179962	0.850447	ND	0.637777	0.880736
2.10995	EW	0.0301253	1.28379	MW	0.171279	1.4126	MW	0.0885191	1.64953	SW	0.0248265	1.50437	SW	0.0246556	1.7387	SW	0.0319554	1.28379
0.989681	ND	0.661135	1.00959	MW	0.171279	0.694246	ND	0.683649	0.81107	ND	0.641276	0.825856	ND	0.576028	1.36458	MW	0.0989176	0.694246
-0.0822355	ND	0.661135	0.211243	ND	0.593697	0.129153	ND	0.683649	0.347948	ND	0.641276	0.143308	ND	0.576028	0.331587	ND	0.637777	0.129153
-0.0943362	ND	0.661135	0.25697	ND	0.593697	-0.47982	ND	0.683649	-0.113999	ND	0.641276	-0.162402	ND	0.576028	1.712	SW	0.0319554	-0.47982
-1.45303	MD	0.167163	-1.38398	MD	0.185266	-1.39997	MD	0.162011	-1.39181	MD	0.185169	-1.40937	MD	0.192604	-1.19331	MD	0.188726	-1.40937
-1.19421	MD	0.167163	-1.04789	MD	0.185266	-1.07115	MD	0.162011	-1.08071	MD	0.185169	-1.09671	MD	0.192604	-1.21228	MD	0.188726	-1.09671
-1.59346	SD	0.0213547	-1.3653	MD	0.185266	-1.53235	SD	0.0462887	-1.43369	MD	0.185169	-1.41663	MD	0.192604	-1.57016	SD	0.0267087	-1.41663
-0.966257	ND	0.661135	0.0648886	ND	0.593697	-1.16905	MD	0.162011	-0.769928	ND	0.641276	-0.37985	ND	0.576028	-0.977012	ND	0.637777	-0.966257
-0.697085	ND	0.661135	-0.577238	ND	0.593697	-0.498441	ND	0.683649	-0.623123	ND	0.641276	-0.33052	ND	0.576028	-0.398714	ND	0.637777	-0.498441
-0.211646	ND	0.661135	0.115842	ND	0.593697	-0.00686835	ND	0.683649	-0.195151	ND	0.641276	0.0373165	ND	0.576028	-0.0625201	ND	0.637777	-0.00686835
0.53894	ND	0.661135	0.697212	ND	0.593697	0.571318	ND	0.683649	0.573932	ND	0.641276	0.783731	ND	0.576028	0.49176	ND	0.637777	0.571318
0.618734	ND	0.661135	1.24189	MW	0.171279	1.09556	MW	0.0885191	1.34813	MW	0.10789	1.23159	MW	0.179962	1.05348	MW	0.0989176	0.618734
0.299976	ND	0.661135	0.952216	ND	0.593697	0.858361	ND	0.683649	0.784069	ND	0.641276	0.984961	ND	0.576028	0.704569	ND	0.637777	0.858361
0.136177	ND	0.661135	0.738706	ND	0.593697	0.813554	ND	0.683649	0.582769	ND	0.641276	0.765726	ND	0.576028	0.588119	ND	0.637777	0.813554
1.13748	MW	0.0866128	0.418938	ND	0.593697	0.707316	ND	0.683649	0.500521	ND	0.641276	0.459462	ND	0.576028	0.90817	ND	0.637777	0.707316
-0.241636	ND	0.661135	-0.746676	ND	0.593697	0.303242	ND	0.683649	-0.47642	ND	0.641276	-0.546857	ND	0.576028	-0.694119	ND	0.637777	0.303242
-1.01909	MD	0.167163	-1.17233	MD	0.185266	-1.05591	MD	0.162011	-1.08685	MD	0.185169	-1.08124	MD	0.192604	-1.21014	MD	0.188726	-1.08124
-1.1729	MD	0.167163	-1.1346	MD	0.185266	-1.33891	MD	0.162011	-0.834247	ND	0.641276	-1.23237	MD	0.192604	-1.10349	MD	0.188726	-0.834247
-1.2814	MD	0.167163	-0.945366	ND	0.593697	-1.14908	MD	0.162011	-1.24368	MD	0.185169	-1.15131	MD	0.192604	-1.31525	MD	0.188726	-0.945366
-0.925233	ND	0.661135	-0.821001	ND	0.593697	-1.13303	MD	0.162011	-0.986897	ND	0.641276	-0.996125	ND	0.576028	-1.1371	MD	0.188726	-0.925233
-0.630245	ND	0.661135	-0.550895	ND	0.593697	-0.63987	ND	0.683649	-0.585949	ND	0.641276	-0.447437	ND	0.576028	-0.574038	ND	0.637777	-0.63987
-0.4165	ND	0.661135	-0.0304492	ND	0.593697	-0.0669096	ND	0.683649	-0.109604	ND	0.641276	0.0398206	ND	0.576028	-0.0404667	ND	0.637777	-0.0669096
-0.00333789	ND	0.661135	0.553713	ND	0.593697	0.456231	ND	0.683649	0.451996	ND	0.641276	0.602557	ND	0.576028	0.415482	ND	0.637777	0.456231
0.286534	ND	0.661135	1.00649	MW	0.171279	0.958401	ND	0.683649	0.898893	ND	0.641276	1.05555	MW	0.179962	0.702352	ND	0.637777	0.958401
0.639127	ND	0.661135	1.36043	MW	0.171279	1.11426	MW	0.0885191	1.83623	SW	0.0248265	1.26721	MW	0.179962	1.30059	MW	0.0989176	0.639127
0.274964	ND	0.661135	0.875049	ND	0.593697	0.73666	ND	0.683649	0.876521	ND	0.641276	0.867772	ND	0.576028	0.964478	ND	0.637777	0.73666
-0.182771	ND	0.661135	-0.106868	ND	0.593697	-0.168851	ND	0.683649	0.025101	ND	0.641276	-0.0836665	ND	0.576028	0.0367959	ND	0.637777	-0.168851
-0.0194771	ND	0.661135	-0.349566	ND	0.593697	-0.430618	ND	0.683649	-0.189456	ND	0.641276	-0.348789	ND	0.576028	0.107287	ND	0.637777	-0.430618
-1.1798	MD	0.167163	-1.1431	MD	0.185266	-1.40001	MD	0.162011	-1.159	MD	0.185169	-0.340144	ND	0.576028	-1.10922	MD	0.188726	-0.340144
-1.25664	MD	0.167163	-1.42347	MD	0.185266	-1.75532	SD	0.0462887	-1.41489	MD	0.185169	-1.41664	MD	0.192604	-1.46807	MD	0.188726	-1.41664
-1.5041	SD	0.0213547	-1.3112	MD	0.185266	-1.37835	MD	0.162011	-1.24538	MD	0.185169	-1.47458	MD	0.192604	-1.49447	MD	0.188726	-1.47458
-1.0393	MD	0.167163	-1.1912	MD	0.185266	-1.30039	MD	0.162011	-0.5868	ND	0.641276	-1.08631	MD	0.192604	-0.921976	ND	0.637777	-0.5868
-0.422722	ND	0.661135	-0.395105	ND	0.593697	-0.743687	ND	0.683649	-0.410847	ND	0.641276	-0.429695	ND	0.576028	-0.0697234	ND	0.637777	-0.743687
-0.237162	ND	0.661135	0.0815587	ND	0.593697	0.0422195	ND	0.683649	-0.0382912	ND	0.641276	0.137727	ND	0.576028	0.203915	ND	0.637777	0.0422195
0.154838	ND	0.661135	0.689173	ND	0.593697	0.571219	ND	0.683649	0.734155	ND	0.641276	0.711751	ND	0.576028	0.459975	ND	0.637777	0.571219
2.62037	EW	0.0301253	1.64082	SW	0.0159668	2.0794	EW	0.00534101	2.13463	EW	0.0159084	1.80457	SW	0.0246556	2.08888	EW	0.015915	2.62037
2.47674	EW	0.0301253	1.97495	SW	0.0159668	2.02067	EW	0.00534101	1.76814	SW	0.0248265	1.91292	SW	0.0246556	2.69834	EW	0.015915	2.47674
1.62798	SW	0.0336097	1.39642	MW	0.171279	1.81071	SW	0.0141916	0.852152	ND	0.641276	1.0185	MW	0.179962	1.58576	SW	0.0319554	0.852152
0.697992	ND	0.661135	0.264572	ND	0.593697	0.199565	ND	0.683649	0.269201	ND	0.641276	0.347423	ND	0.576028	0.471982	ND	0.637777	0.199565
0.921481	ND	0.661135	0.00835504	ND	0.593697	0.0791813	ND	0.683649	0.429292	ND	0.641276	0.387444	ND	0.576028	0.424308	ND	0.637777	0.0791813
-0.860935	ND	0.661135	-0.894659	ND	0.593697	-1.30882	MD	0.162011	-0.961911	ND	0.641276	-1.16922	MD	0.192604	-1.01725	MD	0.188726	-0.860935
-0.823006	ND	0.661135	-0.945787	ND	0.593697	-1.12301	MD	0.162011	-0.988641	ND	0.641276	-0.952726	ND	0.576028	-1.1574	MD	0.188726	-0.823006
-1.30287	MD	0.167163	-1.32981	MD	0.185266	-1.67726	SD	0.0462887	-1.41923	MD	0.185169	-1.51709	SD	0.0249672	-1.38801	MD	0.188726	-1.38801
-1.39891	MD	0.167163	-1.12027	MD	0.185266	-1.4982	MD	0.162011	-1.3053	MD	0.185169	-1.33562	MD	0.192604	-1.22527	MD	0.188726	-1.33562
-0.761423	ND	0.661135	-0.52435	ND	0.593697	-0.637162	ND	0.683649	-0.54083	ND	0.641276	-0.348885	ND	0.576028	-0.678246	ND	0.637777	-0.637162
-0.247456	ND	0.661135	0.142598	ND	0.593697	-0.0317256	ND	0.683649	0.0842047	ND	0.641276	0.102799	ND	0.576028	0.0498247	ND	0.637777	-0.0317256
0.21827	ND	0.661135	0.720692	ND	0.593697	0.530032	ND	0.683649	0.628331	ND	0.641276	0.7064	ND	0.576028	0.664705	ND	0.637777	0.530032
0.545592	ND	0.661135	1.19207	MW	0.171279	1.28696	MW	0.0885191	1.0089	MW	0.10789	1.25805	MW	0.179962	0.982634	ND	0.637777	0.545592
0.326566	ND	0.661135	0.931667	ND	0.593697	1.28665	MW	0.0885191	0.822079	ND	0.641276	0.938667	ND	0.576028	0.838069	ND	0.637777	0.326566
1.62558	SW	0.0336097	1.85621	SW	0.0159668	0.874267	ND	0.683649	1.27641	MW	0.10789	1.17558	MW	0.179962	2.63547	EW	0.015915	0.874267
0.625973	ND	0.661135	0.000395431	ND	0.593697	-0.046686	ND	0.683649	0.0341857	ND	0.641276	0.318841	ND	0.576028	1.11693	MW	0.0989176	-0.046686
0.825016	ND	0.661135	-0.129246	ND	0.593697	-0.389748	ND	0.683649	-0.305501	ND	0.641276	-0.00505956	ND	0.576028	1.1335	MW	0.0989176	-0.389748
1.53662	SW	0.0336097	0.0543378	ND	0.593697	-0.739787	ND	0.683649	0.119559	ND	0.641276	0.0961687	ND	0.576028	0.880722	ND	0.637777	-0.739787
-0.345175	ND	0.661135	-1.00463	MD	0.185266	-1.11396	MD	0.162011	-1.00119	MD	0.185169	-0.826791	ND	0.576028	-1.04933	MD	0.188726	-0.345175
-0.398793	ND	0.661135	-0.730058	ND	0.593697	-0.48036	ND	0.683649	-0.70921	ND	0.641276	-0.587477	ND	0.576028	-0.98453	ND	0.637777	-0.48036
-0.78855	ND	0.661135	0.444809	ND	0.593697	-0.159161	ND	0.683649	-0.4014	ND	0.641276	0.031502	ND	0.576028	-0.605851	ND	0.637777	-0.159161
-0.632539	ND	0.661135	-0.463068	ND	0.593697	-0.16404	ND	0.683649	-0.523313	ND	0.641276	-0.261915	ND	0.576028	-0.561922	ND	0.637777	-0.16404
-0.413787	ND	0.661135	-0.10863	ND	0.593697	-0.255648	ND	0.683649	-0.152938	ND	0.641276	-0.0937506	ND	0.576028	-0.0881248	ND	0.637777	-0.255648
-0.0345389	ND	0.661135	0.566092	ND	0.593697	0.372348	ND	0.683649	0.484778	ND	0.641276	0.51636	ND	0.576028	0.402807	ND	0.637777	0.372348
0.320586	ND	0.661135	1.0077	MW	0.171279	1.02428	MW	0.0885191	0.859733	ND	0.641276	0.970894	ND	0.576028	0.717785	ND	0.637777	0.320586
0.651587	ND	0.661135	1.25757	MW	0.171279	0.798638	ND	0.683649	0.891671	ND	0.641276	1.09585	MW	0.179962	0.85103	ND	0.637777	0.798638
2.09477	EW	0.0301253	3.51424	EW	0.00706124	1.62559	SW	0.0141916	1.60194	SW	0.0248265	1.69071	SW	0.0246556	1.52642	SW	0.0319554	1.52642
0.903965	ND	0.661135	0.399723	ND	0.593697	-0.00423691	ND	0.683649	0.600578	ND	0.641276	0.288782	ND	0.576028	1.26459	MW	0.0989176	-0.00423691
-0.0907336	ND	0.661135	-0.474098	ND	0.593697	-0.359338	ND	0.683649	-0.359644	ND	0.641276	-0.433815	ND	0.576028	-0.222019	ND	0.637777	-0.359338
-1.15173	MD	0.167163	-1.12619	MD	0.185266	-1.16022	MD	0.162011	-1.19251	MD	0.185169	-1.164	MD	0.192604	-1.00527	MD	0.188726	-1.164
-1.38575	MD	0.167163	-1.46064	MD	0.185266	-1.35787	MD	0.162011	-1.35378	MD	0.185169	-1.35805	MD	0.192604	-1.36861	MD	0.188726	-1.35805
-0.884268	ND	0.661135	-1.31864	MD	0.185266	-1.29595	MD	0.162011	-1.13526	MD	0.185169	-1.1097	MD	0.192604	-1.27467	MD	0.188726	-0.884268
-1.31046	MD	0.167163	-1.29617	MD	0.185266	-1.14798	MD	0.162011	-1.15283	MD	0.185169	-1.04381	MD	0.192604	-1.06954	MD	0.188726	-1.04381
-0.147744	ND	0.661135	0.299277	ND	0.593697	-0.255936	ND	0.683649	-0.124833	ND	0.641276	0.0628547	ND	0.576028	-0.268136	ND	0.637777	-0.255936
-0.0493852	ND	0.661135	0.205173	ND	0.593697	0.0846457	ND	0.683649	0.0872861	ND	0.641276	0.134572	ND	0.576028	-0.0252409	ND	0.637777	0.0846457
0.262572	ND	0.661135	0.71308	ND	0.593697	0.508011	ND	0.683649	0.672911	ND	0.641276	0.706795	ND	0.576028	0.621444	ND	0.637777	0.508011
0.534741	ND	0.661135	0.97557	ND	0.593697	0.854601	ND	0.683649	0.980049	ND	0.641276	1.04157	MW	0.179962	0.712702	ND	0.637777	0.854601
0.65531	ND	0.661135	1.11018	MW	0.171279	1.37819	MW	0.0885191	0.926305	ND	0.641276	1.07699	MW	0.179962	0.880782	ND	0.637777	0.65531
0.804547	ND	0.661135	0.970649	ND	0.593697	1.02397	MW	0.0885191	0.914307	ND	0.641276	0.964426	ND	0.576028	1.38468	MW	0.0989176	0.804547
0.801715	ND	0.661135	0.785518	ND	0.593697	0.965792	ND	0.683649	0.80022	ND	0.641276	0.864698	ND	0.576028	1.19497	MW	0.0989176	0.965792
-0.182185	ND	0.661135	-0.0407058	ND	0.593697	-0.279901	ND	0.683649	-0.304162	ND	0.641276	-0.244831	ND	0.576028	-0.384391	ND	0.637777	-0.279901
-0.547974	ND	0.661135	-1.00897	MD	0.185266	-0.194461	ND	0.683649	-0.669329	ND	0.641276	-0.586506	ND	0.576028	-0.807489	ND	0.637777	-0.194461
-0.926611	ND	0.661135	-1.30604	MD	0.185266	-0.895779	ND	0.683649	-1.10813	MD	0.185169	-1.13186	MD	0.192604	-1.03921	MD	0.188726	-0.895779
-1.50222	SD	0.0213547	-1.49004	MD	0.185266	-1.51832	SD	0.0462887	-1.40491	MD	0.185169	-1.5768	SD	0.0249672	-1.48405	MD	0.188726	-1.48405
-1.21706	MD	0.167163	-1.05133	MD	0.185266	-0.567501	ND	0.683649	-0.893868	ND	0.641276	-0.945911	ND	0.576028	-1.12527	MD	0.188726	-0.567501
0.32217	ND	0.661135	0.897394	ND	0.593697	-0.0506959	ND	0.683649	0.133769	ND	0.641276	0.457579	ND	0.576028	0.033976	ND	0.637777	-0.0506959
-0.176233	ND	0.661135	0.0647681	ND	0.593697	0.416304	ND	0.683649	0.0878399	ND	0.641276	0.117754	ND	0.576028	0.0234919	ND	0.637777	0.416304
0.178704	ND	0.661135	0.686853	ND	0.593697	0.511153	ND	0.683649	0.654244	ND	0.641276	0.668817	ND	0.576028	0.459933	ND	0.637777	0.511153
0.841823	ND	0.661135	1.24264	MW	0.171279	0.983976	ND	0.683649	1.0352	MW	0.10789	1.14487	MW	0.179962	1.55461	SW	0.0319554	0.983976
0.34237	ND	0.661135	1.05997	MW	0.171279	1.20459	MW	0.0885191	1.05492	MW	0.10789	1.1234	MW	0.179962	1.35836	MW	0.0989176	0.34237
0.196281	ND	0.661135	0.856035	ND	0.593697	1.25318	MW	0.0885191	1.2005	MW	0.10789	0.949606	ND	0.576028	1.02933	MW	0.0989176	0.196281
0.220614	ND	0.661135	0.119837	ND	0.593697	0.217638	ND	0.683649	-0.00301581	ND	0.641276	0.0834953	ND	0.576028	-0.0115159	ND	0.637777	0.217638
-0.288276	ND	0.661135	-0.158417	ND	0.593697	-0.439645	ND	0.683649	-0.460316	ND	0.641276	-0.374064	ND	0.576028	-0.446565	ND	0.637777	-0.439645
0.784735	ND	0.661135	-0.158248	ND	0.593697	0.266034	ND	0.683649	-0.28126	ND	0.641276	-0.230622	ND	0.576028	0.031812	ND	0.637777	0.266034
-1.45044	MD	0.167163	-1.45235	MD	0.185266	-1.53688	SD	0.0462887	-1.39799	MD	0.185169	-1.44011	MD	0.192604	-1.30557	MD	0.188726	-1.44011
-1.61729	SD	0.0213547	-1.66985	SD	0.0267295	-1.56872	SD	0.0462887	-1.49805	MD	0.185169	-1.66974	SD	0.0249672	-1.67209	SD	0.0267087	-1.49805
-0.915171	ND	0.661135	-0.495321	ND	0.593697	-0.400665	ND	0.683649	-0.726655	ND	0.641276	-0.375385	ND	0.576028	-0.873573	ND	0.637777	-0.400665
-0.823815	ND	0.661135	-0.41223	ND	0.593697	-0.730957	ND	0.683649	-0.369193	ND	0.641276	-0.408746	ND	0.576028	-0.700296	ND	0.637777	-0.730957
-0.419349	ND	0.661135	-0.0895655	ND	0.593697	-0.186991	ND	0.683649	0.030533	ND	0.641276	-0.0820622	ND	0.576028	-0.176327	ND	0.637777	-0.186991
0.110022	ND	0.661135	0.702457	ND	0.593697	0.77136	ND	0.683649	0.661873	ND	0.641276	0.987003	ND	0.576028	0.493874	ND	0.637777	0.77136
0.299118	ND	0.661135	1.00439	MW	0.171279	0.824915	ND	0.683649	0.897616	ND	0.641276	1.03831	MW	0.179962	0.833069	ND	0.637777	0.824915
0.332259	ND	0.661135	1.34318	MW	0.171279	0.846374	ND	0.683649	0.954416	ND	0.641276	1.12931	MW	0.179962	1.01038	MW	0.0989176	0.846374
0.237459	ND	0.661135	0.851921	ND	0.593697	0.628436	ND	0.683649	0.689852	ND	0.641276	0.802603	ND	0.576028	0.61181	ND	0.637777	0.628436
0.960879	ND	0.661135	0.367845	ND	0.593697	0.394046	ND	0.683649	0.462492	ND	0.641276	0.452353	ND	0.576028	0.518694	ND	0.637777	0.394046
-0.117213	ND	0.661135	-0.172529	ND	0.593697	-0.203159	ND	0.683649	-0.36217	ND	0.641276	-0.289008	ND	0.576028	-0.198741	ND	0.637777	-0.203159
-0.361096	ND	0.661135	-0.940661	ND	0.593697	-0.619686	ND	0.683649	-0.791413	ND	0.641276	-0.90545	ND	0.576028	-0.953392	ND	0.637777	-0.619686
-1.41031	MD	0.167163	-1.43613	MD	0.185266	-1.11919	MD	0.162011	-1.34943	MD	0.185169	-1.42445	MD	0.192604	-1.2359	MD	0.188726	-1.42445
-1.20155	MD	0.167163	-0.878513	ND	0.593697	-1.3135	MD	0.162011	-1.53339	SD	0.0249294	-1.12784	MD	0.192604	-1.54608	SD	0.0267087	-0.878513
-1.17617	MD	0.167163	-1.00274	MD	0.185266	-0.909161	ND	0.683649	-1.15295	MD	0.185169	-0.919134	ND	0.576028	-1.23152	MD	0.188726	-0.909161
0.649494	ND	0.661135	0.098385	ND	0.593697	-0.643697	ND	0.683649	-0.138307	ND	0.641276	-0.271973	ND	0.576028	1.12549	MW	0.0989176	-0.643697
-0.0592728	ND	0.661135	0.397573	ND	0.593697	0.117139	ND	0.683649	0.544546	ND	0.641276	0.628986	ND	0.576028	0.0650817	ND	0.637777	0.117139
0.524997	ND	0.661135	0.762155	ND	0.593697	0.567041	ND	0.683649	0.659522	ND	0.641276	0.79713	ND	0.576028	0.596238	ND	0.637777	0.567041
0.260883	ND	0.661135	1.02603	MW	0.171279	0.805098	ND	0.683649	0.920318	ND	0.641276	1.05738	MW	0.179962	0.702269	ND	0.637777	0.805098
0.26569	ND	0.661135	1.02455	MW	0.171279	0.793873	ND	0.683649	0.872407	ND	0.641276	1.01706	MW	0.179962	0.68997	ND	0.637777	0.793873
0.905961	ND	0.661135	1.20927	MW	0.171279	0.715044	ND	0.683649	1.21042	MW	0.10789	1.02827	MW	0.179962	0.964302	ND	0.637777	0.715044
0.386064	ND	0.661135	0.542187	ND	0.593697	0.202286	ND	0.683649	0.309736	ND	0.641276	0.266122	ND	0.576028	0.474045	ND	0.637777	0.202286
0.432391	ND	0.661135	0.0146074	ND	0.593697	-0.472634	ND	0.683649	0.125159	ND	0.641276	-0.271513	ND	0.576028	0.130743	ND	0.637777	-0.472634
-0.799289	ND	0.661135	-0.733336	ND	0.593697	-0.539001	ND	0.683649	-0.482122	ND	0.641276	-0.709431	ND	0.576028	-0.661567	ND	0.637777	-0.539001
-0.71559	ND	0.661135	-1.08745	MD	0.185266	-1.05346	MD	0.162011	-1.25362	MD	0.185169	-1.06584	MD	0.192604	-0.603083	ND	0.637777	-0.71559
-1.18469	MD	0.167163	-0.674676	ND	0.593697	-1.1111	MD	0.162011	-0.796545	ND	0.641276	-1.07279	MD	0.192604	-1.25342	MD	0.188726	-0.796545
-0.488576	ND	0.661135	-0.905377	ND	0.593697	-0.843817	ND	0.683649	-0.839466	ND	0.641276	-0.922473	ND	0.576028	-0.379972	ND	0.637777	-0.843817
-0.102391	ND	0.661135	-0.151091	ND	0.593697	-0.695286	ND	0.683649	-0.0551674	ND	0.641276	-0.210974	ND	0.576028	0.326742	ND	0.637777	-0.695286
-0.166161	ND	0.661135	-0.0851539	ND	0.593697	-0.245418	ND	0.683649	-0.183087	ND	0.641276	0.00552226	ND	0.576028	-0.103867	ND	0.637777	-0.245418
0.788051	ND	0.661135	1.01077	MW	0.171279	1.17891	MW	0.0885191	0.886903	ND	0.641276	1.0939	MW	0.179962	0.792347	ND	0.637777	0.788051
0.702299	ND	0.661135	1.26826	MW	0.171279	0.82298	ND	0.683649	0.992255	ND	0.641276	1.0907	MW	0.179962	0.787659	ND	0.637777	0.82298
0.274077	ND	0.661135	0.979558	ND	0.593697	0.767889	ND	0.683649	0.903943	ND	0.641276	1.06697	MW	0.179962	0.822027	ND	0.637777	0.767889
0.0829202	ND	0.661135	0.838444	ND	0.593697	0.487085	ND	0.683649	0.929629	ND	0.641276	0.797636	ND	0.576028	0.491932	ND	0.637777	0.487085
-0.168184	ND	0.661135	0.104462	ND	0.593697	0.0218899	ND	0.683649	0.119282	ND	0.641276	0.14467	ND	0.576028	0.123232	ND	0.637777	0.0218899
1.49027	MW	0.0866128	0.0886616	ND	0.593697	0.316291	ND	0.683649	1.32397	MW	0.10789	0.643559	ND	0.576028	0.195691	ND	0.637777	0.316291
-0.821387	ND	0.661135	-1.00265	MD	0.185266	-0.770776	ND	0.683649	-0.861671	ND	0.641276	-0.764578	ND	0.576028	-0.965009	ND	0.637777	-0.770776
-1.35475	MD	0.167163	-1.39817	MD	0.185266	-1.40323	MD	0.162011	-1.36192	MD	0.185169	-1.06594	MD	0.192604	-1.48726	MD	0.188726	-1.06594
-1.2755	MD	0.167163	-1.07326	MD	0.185266	-1.2931	MD	0.162011	-1.3665	MD	0.185169	-1.03117	MD	0.192604	-1.30892	MD	0.188726	-1.03117
-0.956024	ND	0.661135	-0.702724	ND	0.593697	-0.433516	ND	0.683649	-0.849873	ND	0.641276	-0.670415	ND	0.576028	-0.889488	ND	0.637777	-0.433516
-0.788767	ND	0.661135	-0.45347	ND	0.593697	-0.599607	ND	0.683649	-0.487305	ND	0.641276	-0.395689	ND	0.576028	-0.474818	ND	0.637777	-0.599607
-0.440874	ND	0.661135	0.0387468	ND	0.593697	-0.0182942	ND	0.683649	0.00612705	ND	0.641276	0.0157237	ND	0.576028	-0.0879737	ND	0.637777	-0.0182942
0.059585	ND	0.661135	0.715438	ND	0.593697	0.501567	ND	0.683649	0.62655	ND	0.641276	0.687838	ND	0.576028	0.453206	ND	0.637777	0.501567
0.241119	ND	0.661135	0.947493	ND	0.593697	0.826129	ND	0.683649	0.836654	ND	0.641276	0.953773	ND	0.576028	0.646144	ND	0.637777	0.826129
